# Supplementary material for: Identification of the miRNAome of early mesoderm progenitor cells and cardiomyocytes derived from human pluripotent stem cells
Source: PubMed Central journal article supplement (PMC5966391; doi:10.1038/s41598-018-26156-3), 2018-05-23
Supplement: 41598_2018_26156_MOESM4_ESM.pdf [file 41598_2018_26156_MOESM4_ESM.pdf]

# Identification of the miRNAome of early mesoderm progenitor cells and cardiomyocytes derived from human pluripotent stem cells

Ximena Garate<sup>1</sup>, Alejandro La Greca<sup>1</sup>, Gabriel Neiman<sup>1</sup>, Carolina Blüguermann<sup>1</sup>, Natalia L. Santín Velazque<sup>1</sup>, Lucía N. Moro<sup>1</sup>, Carlos Luzzani<sup>1</sup>, Elida Scassa<sup>1</sup>, Gustavo E. Sevlever<sup>1</sup>, Leonardo Romorini<sup>1</sup>, and Santiago G. Miriuka<sup>1\*</sup>

<sup>1</sup>LIAN-CONICET, FLENI - Ruta 9 km 52.5 - Belen de Escobar, Provincia de Buenos Aires, Argentina

\*smiriuka@fleni.org.ar

## ABSTRACT

[[1]]

|                                  | NAME                             | MEM.SHIP  |
|----------------------------------|----------------------------------|-----------|
| hsa-let-7a-5p/hsa-let-7a-1       | hsa-let-7a-5p/hsa-let-7a-1       | 0.9999504 |
| hsa-let-7a-3p/hsa-let-7a-1       | hsa-let-7a-3p/hsa-let-7a-1       | 0.9825007 |
| hsa-let-7a-5p/hsa-let-7a-2       | hsa-let-7a-5p/hsa-let-7a-2       | 0.9999527 |
| hsa-let-7a-5p/hsa-let-7a-3       | hsa-let-7a-5p/hsa-let-7a-3       | 0.9999625 |
| hsa-let-7a-3p/hsa-let-7a-3       | hsa-let-7a-3p/hsa-let-7a-3       | 0.9812492 |
| hsa-let-7b-5p/hsa-let-7b         | hsa-let-7b-5p/hsa-let-7b         | 0.9982536 |
| hsa-let-7c-5p/hsa-let-7c         | hsa-let-7c-5p/hsa-let-7c         | 0.9982753 |
| hsa-let-7d-5p/hsa-let-7d         | hsa-let-7d-5p/hsa-let-7d         | 0.9826983 |
| hsa-let-7d-3p/hsa-let-7d         | hsa-let-7d-3p/hsa-let-7d         | 0.9961365 |
| hsa-let-7e-5p/hsa-let-7e         | hsa-let-7e-5p/hsa-let-7e         | 0.9992938 |
| hsa-let-7e-3p/hsa-let-7e         | hsa-let-7e-3p/hsa-let-7e         | 0.9999566 |
| hsa-let-7f-5p/hsa-let-7f-1       | hsa-let-7f-5p/hsa-let-7f-1       | 0.9855286 |
| hsa-let-7f-5p/hsa-let-7f-2       | hsa-let-7f-5p/hsa-let-7f-2       | 0.9856969 |
| hsa-let-7g-5p/hsa-let-7g         | hsa-let-7g-5p/hsa-let-7g         | 0.9893510 |
| hsa-miR-1-3p/hsa-mir-1-1         | hsa-miR-1-3p/hsa-mir-1-1         | 0.9999209 |
| hsa-miR-1-3p/hsa-mir-1-2         | hsa-miR-1-3p/hsa-mir-1-2         | 0.9999213 |
| hsa-miR-100-5p/hsa-mir-100       | hsa-miR-100-5p/hsa-mir-100       | 0.9980722 |
| hsa-miR-10a-5p/hsa-mir-10a       | hsa-miR-10a-5p/hsa-mir-10a       | 0.9210199 |
| hsa-miR-10a-3p/hsa-mir-10a       | hsa-miR-10a-3p/hsa-mir-10a       | 0.9016453 |
| hsa-miR-10b-5p/hsa-mir-10b       | hsa-miR-10b-5p/hsa-mir-10b       | 0.9986130 |
| hsa-miR-122-5p/hsa-mir-122       | hsa-miR-122-5p/hsa-mir-122       | 0.9360558 |
| hsa-miR-1226-5p/hsa-mir-1226     | hsa-miR-1226-5p/hsa-mir-1226     | 0.9909916 |
| hsa-miR-1226-3p/hsa-mir-1226     | hsa-miR-1226-3p/hsa-mir-1226     | 0.9995260 |
| hsa-miR-1228-5p/hsa-mir-1228     | hsa-miR-1228-5p/hsa-mir-1228     | 0.9993874 |
| hsa-miR-1229-3p/hsa-mir-1229     | hsa-miR-1229-3p/hsa-mir-1229     | 0.9959891 |
| hsa-miR-1246/hsa-mir-1246        | hsa-miR-1246/hsa-mir-1246        | 0.8260523 |
| hsa-miR-125a-5p/hsa-mir-125a     | hsa-miR-125a-5p/hsa-mir-125a     | 0.9992489 |
| hsa-miR-125b-5p/hsa-mir-125b-1   | hsa-miR-125b-5p/hsa-mir-125b-1   | 0.9979783 |
| hsa-miR-125b-1-3p/hsa-mir-125b-1 | hsa-miR-125b-1-3p/hsa-mir-125b-1 | 0.9935424 |
| hsa-miR-125b-5p/hsa-mir-125b-2   | hsa-miR-125b-5p/hsa-mir-125b-2   | 0.9979635 |
| hsa-miR-125b-2-3p/hsa-mir-125b-2 | hsa-miR-125b-2-3p/hsa-mir-125b-2 | 0.9986774 |
| hsa-miR-1269a/hsa-mir-1269a      | hsa-miR-1269a/hsa-mir-1269a      | 0.8561939 |
| hsa-miR-1269b/hsa-mir-1269b      | hsa-miR-1269b/hsa-mir-1269b      | 0.9570958 |
| hsa-miR-1271-5p/hsa-mir-1271     | hsa-miR-1271-5p/hsa-mir-1271     | 0.9883782 |
| hsa-miR-1277-5p/hsa-mir-1277     | hsa-miR-1277-5p/hsa-mir-1277     | 0.9936900 |
| hsa-miR-1277-3p/hsa-mir-1277     | hsa-miR-1277-3p/hsa-mir-1277     | 0.9983574 |
| hsa-miR-129-5p/hsa-mir-129-1     | hsa-miR-129-5p/hsa-mir-129-1     | 0.9992174 |
| hsa-miR-129-5p/hsa-mir-129-2     | hsa-miR-129-5p/hsa-mir-129-2     | 0.9992174 |
| hsa-miR-129-2-3p/hsa-mir-129-2   | hsa-miR-129-2-3p/hsa-mir-129-2   | 0.9972829 |
| hsa-miR-1290/hsa-mir-1290        | hsa-miR-1290/hsa-mir-1290        | 0.9110183 |
| hsa-miR-1301-3p/hsa-mir-1301     | hsa-miR-1301-3p/hsa-mir-1301     | 0.9548124 |
| hsa-miR-132-5p/hsa-mir-132       | hsa-miR-132-5p/hsa-mir-132       | 0.9951338 |
| hsa-miR-132-3p/hsa-mir-132       | hsa-miR-132-3p/hsa-mir-132       | 0.9844168 |
| hsa-miR-133a-5p/hsa-mir-133a-1   | hsa-miR-133a-5p/hsa-mir-133a-1   | 0.9941540 |
| hsa-miR-133a-3p/hsa-mir-133a-1   | hsa-miR-133a-3p/hsa-mir-133a-1   | 0.9946858 |
| hsa-miR-133a-5p/hsa-mir-133a-2   | hsa-miR-133a-5p/hsa-mir-133a-2   | 0.9941540 |
| hsa-miR-133a-3p/hsa-mir-133a-2   | hsa-miR-133a-3p/hsa-mir-133a-2   | 0.9946858 |
| hsa-miR-133b/hsa-mir-133b        | hsa-miR-133b/hsa-mir-133b        | 0.9923439 |
| hsa-miR-134-5p/hsa-mir-134       | hsa-miR-134-5p/hsa-mir-134       | 0.9826546 |
| hsa-miR-140-5p/hsa-mir-140       | hsa-miR-140-5p/hsa-mir-140       | 0.9990580 |
| hsa-miR-143-5p/hsa-mir-143       | hsa-miR-143-5p/hsa-mir-143       | 0.9926450 |
| hsa-miR-143-3p/hsa-mir-143       | hsa-miR-143-3p/hsa-mir-143       | 0.9933674 |
| hsa-miR-145-5p/hsa-mir-145       | hsa-miR-145-5p/hsa-mir-145       | 0.9999794 |
| hsa-miR-145-3p/hsa-mir-145       | hsa-miR-145-3p/hsa-mir-145       | 0.9920946 |
| hsa-miR-148b-5p/hsa-mir-148b     | hsa-miR-148b-5p/hsa-mir-148b     | 0.9450881 |
| hsa-miR-148b-3p/hsa-mir-148b     | hsa-miR-148b-3p/hsa-mir-148b     | 0.9543848 |
| hsa-miR-151a-5p/hsa-mir-151a     | hsa-miR-151a-5p/hsa-mir-151a     | 0.9947049 |
| hsa-miR-151b/hsa-mir-151b        | hsa-miR-151b/hsa-mir-151b        | 0.9999978 |
| hsa-miR-152-5p/hsa-mir-152       | hsa-miR-152-5p/hsa-mir-152       | 0.9981693 |
| hsa-miR-152-3p/hsa-mir-152       | hsa-miR-152-3p/hsa-mir-152       | 0.9985665 |
| hsa-miR-181a-5p/hsa-mir-181a-1   | hsa-miR-181a-5p/hsa-mir-181a-1   | 0.9984285 |
| hsa-miR-181a-3p/hsa-mir-181a-1   | hsa-miR-181a-3p/hsa-mir-181a-1   | 0.9999303 |

|                                  |                                  |            |
|----------------------------------|----------------------------------|------------|
| hsa-miR-181a-5p/hsa-mir-181a-2   | hsa-miR-181a-5p/hsa-mir-181a-2   | 0.9984296  |
| hsa-miR-181a-2-3p/hsa-mir-181a-2 | hsa-miR-181a-2-3p/hsa-mir-181a-2 | 0.9937515  |
| hsa-miR-181b-5p/hsa-mir-181b-1   | hsa-miR-181b-5p/hsa-mir-181b-1   | 0.9999922  |
| hsa-miR-181b-5p/hsa-mir-181b-2   | hsa-miR-181b-5p/hsa-mir-181b-2   | 0.9999867  |
| hsa-miR-181b-2-3p/hsa-mir-181b-2 | hsa-miR-181b-2-3p/hsa-mir-181b-2 | 0.7693284  |
| hsa-miR-181c-5p/hsa-mir-181c     | hsa-miR-181c-5p/hsa-mir-181c     | 0.9946840  |
| hsa-miR-181c-3p/hsa-mir-181c     | hsa-miR-181c-3p/hsa-mir-181c     | 0.7905607  |
| hsa-miR-181d-5p/hsa-mir-181d     | hsa-miR-181d-5p/hsa-mir-181d     | 0.8652201  |
| hsa-miR-184/hsa-mir-184          | hsa-miR-184/hsa-mir-184          | 0.9999582  |
| hsa-miR-186-5p/hsa-mir-186       | hsa-miR-186-5p/hsa-mir-186       | 0.9390749  |
| hsa-miR-190a-5p/hsa-mir-190a     | hsa-miR-190a-5p/hsa-mir-190a     | 0.9998709  |
| hsa-miR-1914-5p/hsa-mir-1914     | hsa-miR-1914-5p/hsa-mir-1914     | 0.9343663  |
| hsa-miR-192-5p/hsa-mir-192       | hsa-miR-192-5p/hsa-mir-192       | 0.9919734  |
| hsa-miR-193b-5p/hsa-mir-193b     | hsa-miR-193b-5p/hsa-mir-193b     | 0.9997841  |
| hsa-miR-194-5p/hsa-mir-194-1     | hsa-miR-194-5p/hsa-mir-194-1     | 0.9988581  |
| hsa-miR-194-5p/hsa-mir-194-2     | hsa-miR-194-5p/hsa-mir-194-2     | 0.9990409  |
| hsa-miR-196b-5p/hsa-mir-196b     | hsa-miR-196b-5p/hsa-mir-196b     | 0.9976961  |
| hsa-miR-199a-5p/hsa-mir-199a-1   | hsa-miR-199a-5p/hsa-mir-199a-1   | 0.9904254  |
| hsa-miR-199a-3p/hsa-mir-199a-1   | hsa-miR-199a-3p/hsa-mir-199a-1   | 0.9680151  |
| hsa-miR-199a-5p/hsa-mir-199a-2   | hsa-miR-199a-5p/hsa-mir-199a-2   | 0.9904516  |
| hsa-miR-199a-3p/hsa-mir-199a-2   | hsa-miR-199a-3p/hsa-mir-199a-2   | 0.9678453  |
| hsa-miR-199b-3p/hsa-mir-199b     | hsa-miR-199b-3p/hsa-mir-199b     | 0.9680151  |
| hsa-miR-206/hsa-mir-206          | hsa-miR-206/hsa-mir-206          | 0.9925924  |
| hsa-miR-208a-5p/hsa-mir-208a     | hsa-miR-208a-5p/hsa-mir-208a     | 0.9997386  |
| hsa-miR-208a-3p/hsa-mir-208a     | hsa-miR-208a-3p/hsa-mir-208a     | 0.9992939  |
| hsa-miR-208b-3p/hsa-mir-208b     | hsa-miR-208b-3p/hsa-mir-208b     | 0.9999602  |
| hsa-miR-21-5p/hsa-mir-21         | hsa-miR-21-5p/hsa-mir-21         | 0.9757286  |
| hsa-miR-21-3p/hsa-mir-21         | hsa-miR-21-3p/hsa-mir-21         | 0.8793216  |
| hsa-miR-212-5p/hsa-mir-212       | hsa-miR-212-5p/hsa-mir-212       | 0.9901955  |
| hsa-miR-214-5p/hsa-mir-214       | hsa-miR-214-5p/hsa-mir-214       | 0.9802152  |
| hsa-miR-214-3p/hsa-mir-214       | hsa-miR-214-3p/hsa-mir-214       | 0.9854718  |
| hsa-miR-216b-5p/hsa-mir-216b     | hsa-miR-216b-5p/hsa-mir-216b     | 0.9998922  |
| hsa-miR-218-5p/hsa-mir-218-1     | hsa-miR-218-5p/hsa-mir-218-1     | 0.9983980  |
| hsa-miR-218-5p/hsa-mir-218-2     | hsa-miR-218-5p/hsa-mir-218-2     | 0.9983913  |
| hsa-miR-218-2-3p/hsa-mir-218-2   | hsa-miR-218-2-3p/hsa-mir-218-2   | 0.9998571  |
| hsa-miR-22-5p/hsa-mir-22         | hsa-miR-22-5p/hsa-mir-22         | 0.9902441  |
| hsa-miR-22-3p/hsa-mir-22         | hsa-miR-22-3p/hsa-mir-22         | 0.9980497  |
| hsa-miR-23a-3p/hsa-mir-23a       | hsa-miR-23a-3p/hsa-mir-23a       | 0.9983113  |
| hsa-miR-23b-5p/hsa-mir-23b       | hsa-miR-23b-5p/hsa-mir-23b       | 0.7798598  |
| hsa-miR-23b-3p/hsa-mir-23b       | hsa-miR-23b-3p/hsa-mir-23b       | 0.9980011  |
| hsa-miR-24-1-5p/hsa-mir-24-1     | hsa-miR-24-1-5p/hsa-mir-24-1     | 0.9980660  |
| hsa-miR-24-3p/hsa-mir-24-1       | hsa-miR-24-3p/hsa-mir-24-1       | 0.9866530  |
| hsa-miR-24-3p/hsa-mir-24-2       | hsa-miR-24-3p/hsa-mir-24-2       | 0.9865743  |
| hsa-miR-24-2-5p/hsa-mir-24-2     | hsa-miR-24-2-5p/hsa-mir-24-2     | 0.9984300  |
| hsa-miR-26b-5p/hsa-mir-26b       | hsa-miR-26b-5p/hsa-mir-26b       | 0.9996652  |
| hsa-miR-27a-3p/hsa-mir-27a       | hsa-miR-27a-3p/hsa-mir-27a       | 0.9971615  |
| hsa-miR-27b-3p/hsa-mir-27b       | hsa-miR-27b-3p/hsa-mir-27b       | 0.9649021  |
| hsa-miR-28-5p/hsa-mir-28         | hsa-miR-28-5p/hsa-mir-28         | 0.9999299  |
| hsa-miR-299-3p/hsa-mir-299       | hsa-miR-299-3p/hsa-mir-299       | 0.9593262  |
| hsa-miR-29b-3p/hsa-mir-29b-1     | hsa-miR-29b-3p/hsa-mir-29b-1     | 0.7666241  |
| hsa-miR-29b-3p/hsa-mir-29b-2     | hsa-miR-29b-3p/hsa-mir-29b-2     | 0.7666241  |
| hsa-miR-301a-3p/hsa-mir-301a     | hsa-miR-301a-3p/hsa-mir-301a     | 0.8021942  |
| hsa-miR-30a-5p/hsa-mir-30a       | hsa-miR-30a-5p/hsa-mir-30a       | 0.9933927  |
| hsa-miR-30a-3p/hsa-mir-30a       | hsa-miR-30a-3p/hsa-mir-30a       | 0.7620991  |
| hsa-miR-30b-5p/hsa-mir-30b       | hsa-miR-30b-5p/hsa-mir-30b       | 0.9999795  |
| hsa-miR-30b-3p/hsa-mir-30b       | hsa-miR-30b-3p/hsa-mir-30b       | 0.9972608  |
| hsa-miR-30c-5p/hsa-mir-30c-1     | hsa-miR-30c-5p/hsa-mir-30c-1     | 0.9993108  |
| hsa-miR-30c-1-3p/hsa-mir-30c-1   | hsa-miR-30c-1-3p/hsa-mir-30c-1   | 0.9988592  |
| hsa-miR-30c-5p/hsa-mir-30c-2     | hsa-miR-30c-5p/hsa-mir-30c-2     | 0.9993228  |
| hsa-miR-30d-5p/hsa-mir-30d       | hsa-miR-30d-5p/hsa-mir-30d       | 0.98977645 |
| hsa-miR-30d-3p/hsa-mir-30d       | hsa-miR-30d-3p/hsa-mir-30d       | 0.9394137  |
| hsa-miR-30e-5p/hsa-mir-30e       | hsa-miR-30e-5p/hsa-mir-30e       | 0.9984503  |
| hsa-miR-30e-3p/hsa-mir-30e       | hsa-miR-30e-3p/hsa-mir-30e       | 0.9908981  |
| hsa-miR-3200-3p/hsa-mir-3200     | hsa-miR-3200-3p/hsa-mir-3200     | 0.9668929  |

|                                  |                                  |           |
|----------------------------------|----------------------------------|-----------|
| hsa-miR-324-5p/hsa-mir-324       | hsa-miR-324-5p/hsa-mir-324       | 0.9990771 |
| hsa-miR-328-3p/hsa-mir-328       | hsa-miR-328-3p/hsa-mir-328       | 0.9717812 |
| hsa-miR-331-5p/hsa-mir-331       | hsa-miR-331-5p/hsa-mir-331       | 0.9603835 |
| hsa-miR-331-3p/hsa-mir-331       | hsa-miR-331-3p/hsa-mir-331       | 0.9502842 |
| hsa-miR-335-5p/hsa-mir-335       | hsa-miR-335-5p/hsa-mir-335       | 0.8994658 |
| hsa-miR-338-5p/hsa-mir-338       | hsa-miR-338-5p/hsa-mir-338       | 0.9998207 |
| hsa-miR-338-3p/hsa-mir-338       | hsa-miR-338-3p/hsa-mir-338       | 0.9954096 |
| hsa-miR-346/hsa-mir-346          | hsa-miR-346/hsa-mir-346          | 0.9993994 |
| hsa-miR-34a-5p/hsa-mir-34a       | hsa-miR-34a-5p/hsa-mir-34a       | 0.7767643 |
| hsa-miR-3591-5p/hsa-mir-3591     | hsa-miR-3591-5p/hsa-mir-3591     | 0.9992665 |
| hsa-miR-3607-5p/hsa-mir-3607     | hsa-miR-3607-5p/hsa-mir-3607     | 0.8076347 |
| hsa-miR-3607-3p/hsa-mir-3607     | hsa-miR-3607-3p/hsa-mir-3607     | 0.9999999 |
| hsa-miR-3609/hsa-mir-3609        | hsa-miR-3609/hsa-mir-3609        | 0.9951440 |
| hsa-miR-361-5p/hsa-mir-361       | hsa-miR-361-5p/hsa-mir-361       | 0.9168785 |
| hsa-miR-362-5p/hsa-mir-362       | hsa-miR-362-5p/hsa-mir-362       | 0.8731926 |
| hsa-miR-3653-5p/hsa-mir-3653     | hsa-miR-3653-5p/hsa-mir-3653     | 0.9664676 |
| hsa-miR-3653-3p/hsa-mir-3653     | hsa-miR-3653-3p/hsa-mir-3653     | 0.9987977 |
| hsa-miR-374a-5p/hsa-mir-374a     | hsa-miR-374a-5p/hsa-mir-374a     | 0.9897203 |
| hsa-miR-378a-5p/hsa-mir-378a     | hsa-miR-378a-5p/hsa-mir-378a     | 0.9975819 |
| hsa-miR-378a-3p/hsa-mir-378a     | hsa-miR-378a-3p/hsa-mir-378a     | 0.9925168 |
| hsa-miR-378b/hsa-mir-378b        | hsa-miR-378b/hsa-mir-378b        | 0.9940784 |
| hsa-miR-378c/hsa-mir-378c        | hsa-miR-378c/hsa-mir-378c        | 0.9870931 |
| hsa-miR-378d/hsa-mir-378d-1      | hsa-miR-378d/hsa-mir-378d-1      | 0.9939011 |
| hsa-miR-378d/hsa-mir-378d-2      | hsa-miR-378d/hsa-mir-378d-2      | 0.9946275 |
| hsa-miR-378f/hsa-mir-378f        | hsa-miR-378f/hsa-mir-378f        | 0.9971287 |
| hsa-miR-378g/hsa-mir-378g        | hsa-miR-378g/hsa-mir-378g        | 0.9924512 |
| hsa-miR-378i/hsa-mir-378i        | hsa-miR-378i/hsa-mir-378i        | 0.9942946 |
| hsa-miR-383-5p/hsa-mir-383       | hsa-miR-383-5p/hsa-mir-383       | 0.9995056 |
| hsa-miR-3912-3p/hsa-mir-3912     | hsa-miR-3912-3p/hsa-mir-3912     | 0.9478309 |
| hsa-miR-3938/hsa-mir-3938        | hsa-miR-3938/hsa-mir-3938        | 0.9990292 |
| hsa-miR-410-3p/hsa-mir-410       | hsa-miR-410-3p/hsa-mir-410       | 0.9916150 |
| hsa-miR-411-5p/hsa-mir-411       | hsa-miR-411-5p/hsa-mir-411       | 0.7561420 |
| hsa-miR-411-3p/hsa-mir-411       | hsa-miR-411-3p/hsa-mir-411       | 0.9712818 |
| hsa-miR-422a/hsa-mir-422a        | hsa-miR-422a/hsa-mir-422a        | 0.9950909 |
| hsa-miR-424-5p/hsa-mir-424       | hsa-miR-424-5p/hsa-mir-424       | 0.9859566 |
| hsa-miR-424-3p/hsa-mir-424       | hsa-miR-424-3p/hsa-mir-424       | 0.8999363 |
| hsa-miR-4301/hsa-mir-4301        | hsa-miR-4301/hsa-mir-4301        | 0.9938973 |
| hsa-miR-433-3p/hsa-mir-433       | hsa-miR-433-3p/hsa-mir-433       | 0.8402681 |
| hsa-miR-4473/hsa-mir-4473        | hsa-miR-4473/hsa-mir-4473        | 0.9750258 |
| hsa-miR-4485-3p/hsa-mir-4485     | hsa-miR-4485-3p/hsa-mir-4485     | 0.9968247 |
| hsa-miR-450a-5p/hsa-mir-450a-1   | hsa-miR-450a-5p/hsa-mir-450a-1   | 0.9983070 |
| hsa-miR-450a-5p/hsa-mir-450a-2   | hsa-miR-450a-5p/hsa-mir-450a-2   | 0.9983070 |
| hsa-miR-450a-2-3p/hsa-mir-450a-2 | hsa-miR-450a-2-3p/hsa-mir-450a-2 | 0.9964856 |
| hsa-miR-450b-5p/hsa-mir-450b     | hsa-miR-450b-5p/hsa-mir-450b     | 0.9989068 |
| hsa-miR-4532/hsa-mir-4532        | hsa-miR-4532/hsa-mir-4532        | 0.9970331 |
| hsa-miR-4662a-5p/hsa-mir-4662a   | hsa-miR-4662a-5p/hsa-mir-4662a   | 0.9946371 |
| hsa-miR-483-5p/hsa-mir-483       | hsa-miR-483-5p/hsa-mir-483       | 0.9212795 |
| hsa-miR-483-3p/hsa-mir-483       | hsa-miR-483-3p/hsa-mir-483       | 0.8981758 |
| hsa-miR-490-5p/hsa-mir-490       | hsa-miR-490-5p/hsa-mir-490       | 0.9999556 |
| hsa-miR-490-3p/hsa-mir-490       | hsa-miR-490-3p/hsa-mir-490       | 0.9972247 |
| hsa-miR-491-5p/hsa-mir-491       | hsa-miR-491-5p/hsa-mir-491       | 0.9982874 |
| hsa-miR-499a-5p/hsa-mir-499a     | hsa-miR-499a-5p/hsa-mir-499a     | 0.9940497 |
| hsa-miR-499a-3p/hsa-mir-499a     | hsa-miR-499a-3p/hsa-mir-499a     | 0.9989261 |
| hsa-miR-500a-3p/hsa-mir-500a     | hsa-miR-500a-3p/hsa-mir-500a     | 0.9849089 |
| hsa-miR-500b-5p/hsa-mir-500b     | hsa-miR-500b-5p/hsa-mir-500b     | 0.8512438 |
| hsa-miR-501-5p/hsa-mir-501       | hsa-miR-501-5p/hsa-mir-501       | 0.9489421 |
| hsa-miR-501-3p/hsa-mir-501       | hsa-miR-501-3p/hsa-mir-501       | 0.9835684 |
| hsa-miR-502-3p/hsa-mir-502       | hsa-miR-502-3p/hsa-mir-502       | 0.9955486 |
| hsa-miR-504-5p/hsa-mir-504       | hsa-miR-504-5p/hsa-mir-504       | 0.9875857 |
| hsa-miR-504-3p/hsa-mir-504       | hsa-miR-504-3p/hsa-mir-504       | 0.9946332 |
| hsa-miR-505-5p/hsa-mir-505       | hsa-miR-505-5p/hsa-mir-505       | 0.9721123 |
| hsa-miR-506-3p/hsa-mir-506       | hsa-miR-506-3p/hsa-mir-506       | 0.9839919 |
| hsa-miR-509-5p/hsa-mir-509-1     | hsa-miR-509-5p/hsa-mir-509-1     | 0.9851144 |
| hsa-miR-509-3p/hsa-mir-509-1     | hsa-miR-509-3p/hsa-mir-509-1     | 0.8674008 |

|                                  |                                  |           |
|----------------------------------|----------------------------------|-----------|
| hsa-miR-509-5p/hsa-mir-509-2     | hsa-miR-509-5p/hsa-mir-509-2     | 0.9851144 |
| hsa-miR-509-3p/hsa-mir-509-2     | hsa-miR-509-3p/hsa-mir-509-2     | 0.8674008 |
| hsa-miR-509-3p/hsa-mir-509-3     | hsa-miR-509-3p/hsa-mir-509-3     | 0.8674008 |
| hsa-miR-509-3-5p/hsa-mir-509-3   | hsa-miR-509-3-5p/hsa-mir-509-3   | 0.9183285 |
| hsa-miR-5096/hsa-mir-5096        | hsa-miR-5096/hsa-mir-5096        | 0.9900542 |
| hsa-miR-513c-5p/hsa-mir-513c     | hsa-miR-513c-5p/hsa-mir-513c     | 0.9767150 |
| hsa-miR-514a-3p/hsa-mir-514a-1   | hsa-miR-514a-3p/hsa-mir-514a-1   | 0.9835345 |
| hsa-miR-514a-3p/hsa-mir-514a-2   | hsa-miR-514a-3p/hsa-mir-514a-2   | 0.9835345 |
| hsa-miR-514a-3p/hsa-mir-514a-3   | hsa-miR-514a-3p/hsa-mir-514a-3   | 0.9835345 |
| hsa-miR-542-3p/hsa-mir-542       | hsa-miR-542-3p/hsa-mir-542       | 0.9999354 |
| hsa-miR-548ab/hsa-mir-548ab      | hsa-miR-548ab/hsa-mir-548ab      | 0.9289213 |
| hsa-miR-548e-3p/hsa-mir-548e     | hsa-miR-548e-3p/hsa-mir-548e     | 0.9906273 |
| hsa-miR-550a-3-5p/hsa-mir-550a-3 | hsa-miR-550a-3-5p/hsa-mir-550a-3 | 0.9543915 |
| hsa-miR-551b-5p/hsa-mir-551b     | hsa-miR-551b-5p/hsa-mir-551b     | 0.9978948 |
| hsa-miR-551b-3p/hsa-mir-551b     | hsa-miR-551b-3p/hsa-mir-551b     | 0.9950501 |
| hsa-miR-574-3p/hsa-mir-574       | hsa-miR-574-3p/hsa-mir-574       | 0.8396930 |
| hsa-miR-584-5p/hsa-mir-584       | hsa-miR-584-5p/hsa-mir-584       | 0.9824702 |
| hsa-miR-585-3p/hsa-mir-585       | hsa-miR-585-3p/hsa-mir-585       | 0.9967471 |
| hsa-miR-598-5p/hsa-mir-598       | hsa-miR-598-5p/hsa-mir-598       | 0.9957933 |
| hsa-miR-598-3p/hsa-mir-598       | hsa-miR-598-3p/hsa-mir-598       | 0.9995846 |
| hsa-miR-615-3p/hsa-mir-615       | hsa-miR-615-3p/hsa-mir-615       | 0.9881813 |
| hsa-miR-619-5p/hsa-mir-619       | hsa-miR-619-5p/hsa-mir-619       | 0.9933302 |
| hsa-miR-628-5p/hsa-mir-628       | hsa-miR-628-5p/hsa-mir-628       | 0.9944346 |
| hsa-miR-628-3p/hsa-mir-628       | hsa-miR-628-3p/hsa-mir-628       | 0.9284520 |
| hsa-miR-6505-5p/hsa-mir-6505     | hsa-miR-6505-5p/hsa-mir-6505     | 0.9975126 |
| hsa-miR-6505-3p/hsa-mir-6505     | hsa-miR-6505-3p/hsa-mir-6505     | 0.9998677 |
| hsa-miR-6516-5p/hsa-mir-6516     | hsa-miR-6516-5p/hsa-mir-6516     | 0.9989414 |
| hsa-miR-660-5p/hsa-mir-660       | hsa-miR-660-5p/hsa-mir-660       | 0.9971647 |
| hsa-miR-664a-5p/hsa-mir-664a     | hsa-miR-664a-5p/hsa-mir-664a     | 0.9980778 |
| hsa-miR-670-3p/hsa-mir-670       | hsa-miR-670-3p/hsa-mir-670       | 0.9997070 |
| hsa-miR-675-5p/hsa-mir-675       | hsa-miR-675-5p/hsa-mir-675       | 0.9522535 |
| hsa-miR-675-3p/hsa-mir-675       | hsa-miR-675-3p/hsa-mir-675       | 0.9369275 |
| hsa-miR-7151-5p/hsa-mir-7151     | hsa-miR-7151-5p/hsa-mir-7151     | 0.9957197 |
| hsa-miR-7151-3p/hsa-mir-7151     | hsa-miR-7151-3p/hsa-mir-7151     | 0.9937862 |
| hsa-miR-7704/hsa-mir-7704        | hsa-miR-7704/hsa-mir-7704        | 0.9991466 |
| hsa-miR-874-3p/hsa-mir-874       | hsa-miR-874-3p/hsa-mir-874       | 0.9998862 |
| hsa-miR-876-3p/hsa-mir-876       | hsa-miR-876-3p/hsa-mir-876       | 0.9999995 |
| hsa-miR-887-5p/hsa-mir-887       | hsa-miR-887-5p/hsa-mir-887       | 0.9271585 |
| hsa-miR-887-3p/hsa-mir-887       | hsa-miR-887-3p/hsa-mir-887       | 0.9981109 |
| hsa-miR-888-5p/hsa-mir-888       | hsa-miR-888-5p/hsa-mir-888       | 0.9971154 |
| hsa-miR-95-3p/hsa-mir-95         | hsa-miR-95-3p/hsa-mir-95         | 0.9906650 |
| hsa-miR-98-5p/hsa-mir-98         | hsa-miR-98-5p/hsa-mir-98         | 0.9606225 |
| hsa-miR-99a-5p/hsa-mir-99a       | hsa-miR-99a-5p/hsa-mir-99a       | 0.9967850 |
| hsa-miR-99a-3p/hsa-mir-99a       | hsa-miR-99a-3p/hsa-mir-99a       | 0.9983390 |

[[2]]

|                                | NAME                           | MEM.SHIP  |
|--------------------------------|--------------------------------|-----------|
| hsa-miR-106a-5p/hsa-mir-106a   | hsa-miR-106a-5p/hsa-mir-106a   | 0.9952571 |
| hsa-miR-106a-3p/hsa-mir-106a   | hsa-miR-106a-3p/hsa-mir-106a   | 0.8344156 |
| hsa-miR-106b-5p/hsa-mir-106b   | hsa-miR-106b-5p/hsa-mir-106b   | 0.9985628 |
| hsa-miR-124-3p/hsa-mir-124-1   | hsa-miR-124-3p/hsa-mir-124-1   | 0.9052711 |
| hsa-miR-124-3p/hsa-mir-124-2   | hsa-miR-124-3p/hsa-mir-124-2   | 0.9164731 |
| hsa-miR-124-3p/hsa-mir-124-3   | hsa-miR-124-3p/hsa-mir-124-3   | 0.9164731 |
| hsa-miR-1266-5p/hsa-mir-1266   | hsa-miR-1266-5p/hsa-mir-1266   | 0.8523660 |
| hsa-miR-1278/hsa-mir-1278      | hsa-miR-1278/hsa-mir-1278      | 0.9810142 |
| hsa-miR-1285-3p/hsa-mir-1285-1 | hsa-miR-1285-3p/hsa-mir-1285-1 | 0.8841762 |
| hsa-miR-1285-3p/hsa-mir-1285-2 | hsa-miR-1285-3p/hsa-mir-1285-2 | 0.8986315 |
| hsa-miR-1304-5p/hsa-mir-1304   | hsa-miR-1304-5p/hsa-mir-1304   | 0.8788830 |
| hsa-miR-1304-3p/hsa-mir-1304   | hsa-miR-1304-3p/hsa-mir-1304   | 0.9950131 |
| hsa-miR-135b-5p/hsa-mir-135b   | hsa-miR-135b-5p/hsa-mir-135b   | 0.9999422 |
| hsa-miR-135b-3p/hsa-mir-135b   | hsa-miR-135b-3p/hsa-mir-135b   | 0.9966686 |
| hsa-miR-138-5p/hsa-mir-138-1   | hsa-miR-138-5p/hsa-mir-138-1   | 0.9893615 |
| hsa-miR-138-5p/hsa-mir-138-2   | hsa-miR-138-5p/hsa-mir-138-2   | 0.9004179 |
| hsa-miR-148a-5p/hsa-mir-148a   | hsa-miR-148a-5p/hsa-mir-148a   | 0.9477915 |

|                                  |                                  |           |
|----------------------------------|----------------------------------|-----------|
| hsa-miR-155-5p/hsa-mir-155       | hsa-miR-155-5p/hsa-mir-155       | 0.9996695 |
| hsa-miR-15b-5p/hsa-mir-15b       | hsa-miR-15b-5p/hsa-mir-15b       | 0.9449166 |
| hsa-miR-15b-3p/hsa-mir-15b       | hsa-miR-15b-3p/hsa-mir-15b       | 0.9976242 |
| hsa-miR-16-5p/hsa-mir-16-1       | hsa-miR-16-5p/hsa-mir-16-1       | 0.9299175 |
| hsa-miR-16-5p/hsa-mir-16-2       | hsa-miR-16-5p/hsa-mir-16-2       | 0.9342315 |
| hsa-miR-16-2-3p/hsa-mir-16-2     | hsa-miR-16-2-3p/hsa-mir-16-2     | 0.9396065 |
| hsa-miR-17-5p/hsa-mir-17         | hsa-miR-17-5p/hsa-mir-17         | 0.9916215 |
| hsa-miR-17-3p/hsa-mir-17         | hsa-miR-17-3p/hsa-mir-17         | 0.9997987 |
| hsa-miR-187-3p/hsa-mir-187       | hsa-miR-187-3p/hsa-mir-187       | 0.9878737 |
| hsa-miR-18a-5p/hsa-mir-18a       | hsa-miR-18a-5p/hsa-mir-18a       | 0.9638298 |
| hsa-miR-18b-5p/hsa-mir-18b       | hsa-miR-18b-5p/hsa-mir-18b       | 0.9957594 |
| hsa-miR-20a-5p/hsa-mir-20a       | hsa-miR-20a-5p/hsa-mir-20a       | 0.9974143 |
| hsa-miR-20a-3p/hsa-mir-20a       | hsa-miR-20a-3p/hsa-mir-20a       | 0.9867819 |
| hsa-miR-20b-5p/hsa-mir-20b       | hsa-miR-20b-5p/hsa-mir-20b       | 0.9884360 |
| hsa-miR-20b-3p/hsa-mir-20b       | hsa-miR-20b-3p/hsa-mir-20b       | 0.9851180 |
| hsa-miR-219a-2-3p/hsa-mir-219a-2 | hsa-miR-219a-2-3p/hsa-mir-219a-2 | 0.8335419 |
| hsa-miR-221-3p/hsa-mir-221       | hsa-miR-221-3p/hsa-mir-221       | 0.9860045 |
| hsa-miR-222-5p/hsa-mir-222       | hsa-miR-222-5p/hsa-mir-222       | 0.8958867 |
| hsa-miR-222-3p/hsa-mir-222       | hsa-miR-222-3p/hsa-mir-222       | 0.9392875 |
| hsa-miR-301b-5p/hsa-mir-301b     | hsa-miR-301b-5p/hsa-mir-301b     | 0.7900298 |
| hsa-miR-302a-5p/hsa-mir-302a     | hsa-miR-302a-5p/hsa-mir-302a     | 0.9814319 |
| hsa-miR-302a-3p/hsa-mir-302a     | hsa-miR-302a-3p/hsa-mir-302a     | 0.9583738 |
| hsa-miR-302b-5p/hsa-mir-302b     | hsa-miR-302b-5p/hsa-mir-302b     | 0.8719594 |
| hsa-miR-302b-3p/hsa-mir-302b     | hsa-miR-302b-3p/hsa-mir-302b     | 0.8427805 |
| hsa-miR-302c-5p/hsa-mir-302c     | hsa-miR-302c-5p/hsa-mir-302c     | 0.9996172 |
| hsa-miR-302c-3p/hsa-mir-302c     | hsa-miR-302c-3p/hsa-mir-302c     | 0.8196741 |
| hsa-miR-302d-5p/hsa-mir-302d     | hsa-miR-302d-5p/hsa-mir-302d     | 0.9972956 |
| hsa-miR-302d-3p/hsa-mir-302d     | hsa-miR-302d-3p/hsa-mir-302d     | 0.9852902 |
| hsa-miR-302e/hsa-mir-302e        | hsa-miR-302e/hsa-mir-302e        | 0.9672854 |
| hsa-miR-3144-3p/hsa-mir-3144     | hsa-miR-3144-3p/hsa-mir-3144     | 0.9998880 |
| hsa-miR-335-3p/hsa-mir-335       | hsa-miR-335-3p/hsa-mir-335       | 0.9678290 |
| hsa-miR-363-3p/hsa-mir-363       | hsa-miR-363-3p/hsa-mir-363       | 0.9945926 |
| hsa-miR-3662/hsa-mir-3662        | hsa-miR-3662/hsa-mir-3662        | 0.9737736 |
| hsa-miR-367-3p/hsa-mir-367       | hsa-miR-367-3p/hsa-mir-367       | 0.9954327 |
| hsa-miR-371a-5p/hsa-mir-371a     | hsa-miR-371a-5p/hsa-mir-371a     | 0.9975460 |
| hsa-miR-373-5p/hsa-mir-373       | hsa-miR-373-5p/hsa-mir-373       | 0.9998690 |
| hsa-miR-373-3p/hsa-mir-373       | hsa-miR-373-3p/hsa-mir-373       | 0.7947026 |
| hsa-miR-3934-5p/hsa-mir-3934     | hsa-miR-3934-5p/hsa-mir-3934     | 0.9368584 |
| hsa-miR-3937/hsa-mir-3937        | hsa-miR-3937/hsa-mir-3937        | 0.9679612 |
| hsa-miR-3939/hsa-mir-3939        | hsa-miR-3939/hsa-mir-3939        | 0.9392306 |
| hsa-miR-4521/hsa-mir-4521        | hsa-miR-4521/hsa-mir-4521        | 0.9994503 |
| hsa-miR-548aq-3p/hsa-mir-548aq   | hsa-miR-548aq-3p/hsa-mir-548aq   | 0.9101887 |
| hsa-miR-548k/hsa-mir-548k        | hsa-miR-548k/hsa-mir-548k        | 0.9968194 |
| hsa-miR-548o-3p/hsa-mir-548o     | hsa-miR-548o-3p/hsa-mir-548o     | 0.9980726 |
| hsa-miR-548o-3p/hsa-mir-548o-2   | hsa-miR-548o-3p/hsa-mir-548o-2   | 0.9980726 |
| hsa-miR-548u/hsa-mir-548u        | hsa-miR-548u/hsa-mir-548u        | 0.9252426 |
| hsa-miR-589-5p/hsa-mir-589       | hsa-miR-589-5p/hsa-mir-589       | 0.9981122 |
| hsa-miR-592/hsa-mir-592          | hsa-miR-592/hsa-mir-592          | 0.8795448 |
| hsa-miR-618/hsa-mir-618          | hsa-miR-618/hsa-mir-618          | 0.7613506 |
| hsa-miR-641/hsa-mir-641          | hsa-miR-641/hsa-mir-641          | 0.9942372 |
| hsa-miR-651-5p/hsa-mir-651       | hsa-miR-651-5p/hsa-mir-651       | 0.9994022 |
| hsa-miR-7-5p/hsa-mir-7-1         | hsa-miR-7-5p/hsa-mir-7-1         | 0.9998419 |
| hsa-miR-7-5p/hsa-mir-7-2         | hsa-miR-7-5p/hsa-mir-7-2         | 0.9998929 |
| hsa-miR-7-5p/hsa-mir-7-3         | hsa-miR-7-5p/hsa-mir-7-3         | 0.9998964 |
| hsa-miR-873-5p/hsa-mir-873       | hsa-miR-873-5p/hsa-mir-873       | 0.7529556 |
| hsa-miR-873-3p/hsa-mir-873       | hsa-miR-873-3p/hsa-mir-873       | 0.8356278 |
| hsa-miR-92b-5p/hsa-mir-92b       | hsa-miR-92b-5p/hsa-mir-92b       | 0.9998848 |
| hsa-miR-93-5p/hsa-mir-93         | hsa-miR-93-5p/hsa-mir-93         | 0.9762327 |
| hsa-miR-942-5p/hsa-mir-942       | hsa-miR-942-5p/hsa-mir-942       | 0.9970676 |

[[3]]

|                              | NAME                         | MEM.SHIP  |
|------------------------------|------------------------------|-----------|
| hsa-miR-105-5p/hsa-mir-105-1 | hsa-miR-105-5p/hsa-mir-105-1 | 0.9954713 |
| hsa-miR-105-5p/hsa-mir-105-2 | hsa-miR-105-5p/hsa-mir-105-2 | 0.9954713 |

|                                  |                                  |           |
|----------------------------------|----------------------------------|-----------|
| hsa-miR-106b-3p/hsa-mir-106b     | hsa-miR-106b-3p/hsa-mir-106b     | 0.7815504 |
| hsa-miR-1243/hsa-mir-1243        | hsa-miR-1243/hsa-mir-1243        | 0.9927474 |
| hsa-miR-1247-3p/hsa-mir-1247     | hsa-miR-1247-3p/hsa-mir-1247     | 0.9992493 |
| hsa-miR-1254/hsa-mir-1254-1      | hsa-miR-1254/hsa-mir-1254-1      | 0.9203939 |
| hsa-miR-1254/hsa-mir-1254-2      | hsa-miR-1254/hsa-mir-1254-2      | 0.9187724 |
| hsa-miR-1255a/hsa-mir-1255a      | hsa-miR-1255a/hsa-mir-1255a      | 0.9999490 |
| hsa-miR-1263/hsa-mir-1263        | hsa-miR-1263/hsa-mir-1263        | 0.9998467 |
| hsa-miR-1270/hsa-mir-1270        | hsa-miR-1270/hsa-mir-1270        | 0.8715520 |
| hsa-miR-1275/hsa-mir-1275        | hsa-miR-1275/hsa-mir-1275        | 0.9997560 |
| hsa-miR-128-1-5p/hsa-mir-128-1   | hsa-miR-128-1-5p/hsa-mir-128-1   | 0.8542037 |
| hsa-miR-1292-5p/hsa-mir-1292     | hsa-miR-1292-5p/hsa-mir-1292     | 0.9995237 |
| hsa-miR-1294/hsa-mir-1294        | hsa-miR-1294/hsa-mir-1294        | 0.9783041 |
| hsa-miR-1306-3p/hsa-mir-1306     | hsa-miR-1306-3p/hsa-mir-1306     | 0.9986577 |
| hsa-miR-130b-5p/hsa-mir-130b     | hsa-miR-130b-5p/hsa-mir-130b     | 0.9996407 |
| hsa-miR-135a-3p/hsa-mir-135a-1   | hsa-miR-135a-3p/hsa-mir-135a-1   | 0.9662552 |
| hsa-miR-139-5p/hsa-mir-139       | hsa-miR-139-5p/hsa-mir-139       | 0.9887601 |
| hsa-miR-139-3p/hsa-mir-139       | hsa-miR-139-3p/hsa-mir-139       | 0.9964222 |
| hsa-miR-1468-5p/hsa-mir-1468     | hsa-miR-1468-5p/hsa-mir-1468     | 0.9964007 |
| hsa-miR-151a-3p/hsa-mir-151a     | hsa-miR-151a-3p/hsa-mir-151a     | 0.9758510 |
| hsa-miR-15a-5p/hsa-mir-15a       | hsa-miR-15a-5p/hsa-mir-15a       | 0.9997654 |
| hsa-miR-191-5p/hsa-mir-191       | hsa-miR-191-5p/hsa-mir-191       | 0.9437344 |
| hsa-miR-191-3p/hsa-mir-191       | hsa-miR-191-3p/hsa-mir-191       | 0.9815634 |
| hsa-miR-1910-5p/hsa-mir-1910     | hsa-miR-1910-5p/hsa-mir-1910     | 0.8136871 |
| hsa-miR-195-5p/hsa-mir-195       | hsa-miR-195-5p/hsa-mir-195       | 0.9899006 |
| hsa-miR-195-3p/hsa-mir-195       | hsa-miR-195-3p/hsa-mir-195       | 0.9819416 |
| hsa-miR-203a-3p/hsa-mir-203a     | hsa-miR-203a-3p/hsa-mir-203a     | 0.9058510 |
| hsa-miR-204-5p/hsa-mir-204       | hsa-miR-204-5p/hsa-mir-204       | 0.9999999 |
| hsa-miR-219a-1-3p/hsa-mir-219a-1 | hsa-miR-219a-1-3p/hsa-mir-219a-1 | 0.8662587 |
| hsa-miR-224-5p/hsa-mir-224       | hsa-miR-224-5p/hsa-mir-224       | 0.8895123 |
| hsa-miR-2277-5p/hsa-mir-2277     | hsa-miR-2277-5p/hsa-mir-2277     | 0.9949854 |
| hsa-miR-25-5p/hsa-mir-25         | hsa-miR-25-5p/hsa-mir-25         | 0.9803098 |
| hsa-miR-25-3p/hsa-mir-25         | hsa-miR-25-3p/hsa-mir-25         | 0.8384923 |
| hsa-miR-27a-5p/hsa-mir-27a       | hsa-miR-27a-5p/hsa-mir-27a       | 0.9972418 |
| hsa-miR-296-5p/hsa-mir-296       | hsa-miR-296-5p/hsa-mir-296       | 0.8109991 |
| hsa-miR-301a-5p/hsa-mir-301a     | hsa-miR-301a-5p/hsa-mir-301a     | 0.9602063 |
| hsa-miR-3074-5p/hsa-mir-3074     | hsa-miR-3074-5p/hsa-mir-3074     | 0.9936698 |
| hsa-miR-3177-3p/hsa-mir-3177     | hsa-miR-3177-3p/hsa-mir-3177     | 0.9999405 |
| hsa-miR-3187-3p/hsa-mir-3187     | hsa-miR-3187-3p/hsa-mir-3187     | 0.9898520 |
| hsa-miR-326/hsa-mir-326          | hsa-miR-326/hsa-mir-326          | 0.8487862 |
| hsa-miR-330-5p/hsa-mir-330       | hsa-miR-330-5p/hsa-mir-330       | 0.9998017 |
| hsa-miR-330-3p/hsa-mir-330       | hsa-miR-330-3p/hsa-mir-330       | 0.9544717 |
| hsa-miR-363-5p/hsa-mir-363       | hsa-miR-363-5p/hsa-mir-363       | 0.9811125 |
| hsa-miR-365b-5p/hsa-mir-365b     | hsa-miR-365b-5p/hsa-mir-365b     | 0.9988875 |
| hsa-miR-3661/hsa-mir-3661        | hsa-miR-3661/hsa-mir-3661        | 0.9750084 |
| hsa-miR-3691-5p/hsa-mir-3691     | hsa-miR-3691-5p/hsa-mir-3691     | 0.9356976 |
| hsa-miR-370-3p/hsa-mir-370       | hsa-miR-370-3p/hsa-mir-370       | 0.9352851 |
| hsa-miR-375/hsa-mir-375          | hsa-miR-375/hsa-mir-375          | 0.9979136 |
| hsa-miR-3907/hsa-mir-3907        | hsa-miR-3907/hsa-mir-3907        | 0.9958933 |
| hsa-miR-3928-3p/hsa-mir-3928     | hsa-miR-3928-3p/hsa-mir-3928     | 0.8711210 |
| hsa-miR-3940-3p/hsa-mir-3940     | hsa-miR-3940-3p/hsa-mir-3940     | 0.9992711 |
| hsa-miR-423-3p/hsa-mir-423       | hsa-miR-423-3p/hsa-mir-423       | 0.9428655 |
| hsa-miR-425-3p/hsa-mir-425       | hsa-miR-425-3p/hsa-mir-425       | 0.9520151 |
| hsa-miR-4326/hsa-mir-4326        | hsa-miR-4326/hsa-mir-4326        | 0.9999255 |
| hsa-miR-454-5p/hsa-mir-454       | hsa-miR-454-5p/hsa-mir-454       | 0.9984501 |
| hsa-miR-454-3p/hsa-mir-454       | hsa-miR-454-3p/hsa-mir-454       | 0.9799187 |
| hsa-miR-4665-5p/hsa-mir-4665     | hsa-miR-4665-5p/hsa-mir-4665     | 0.9866227 |
| hsa-miR-4707-5p/hsa-mir-4707     | hsa-miR-4707-5p/hsa-mir-4707     | 0.9972216 |
| hsa-miR-4741/hsa-mir-4741        | hsa-miR-4741/hsa-mir-4741        | 0.9967946 |
| hsa-miR-489-3p/hsa-mir-489       | hsa-miR-489-3p/hsa-mir-489       | 0.9766416 |
| hsa-miR-493-5p/hsa-mir-493       | hsa-miR-493-5p/hsa-mir-493       | 0.9870351 |
| hsa-miR-497-5p/hsa-mir-497       | hsa-miR-497-5p/hsa-mir-497       | 0.9981270 |
| hsa-miR-505-3p/hsa-mir-505       | hsa-miR-505-3p/hsa-mir-505       | 0.8550113 |
| hsa-miR-5100/hsa-mir-5100        | hsa-miR-5100/hsa-mir-5100        | 0.9970248 |
| hsa-miR-576-3p/hsa-mir-576       | hsa-miR-576-3p/hsa-mir-576       | 0.9959343 |

|                                |                                |           |
|--------------------------------|--------------------------------|-----------|
| hsa-miR-582-3p/hsa-mir-582     | hsa-miR-582-3p/hsa-mir-582     | 0.9995644 |
| hsa-miR-597-3p/hsa-mir-597     | hsa-miR-597-3p/hsa-mir-597     | 0.9876876 |
| hsa-miR-625-3p/hsa-mir-625     | hsa-miR-625-3p/hsa-mir-625     | 0.9739104 |
| hsa-miR-629-5p/hsa-mir-629     | hsa-miR-629-5p/hsa-mir-629     | 0.9953671 |
| hsa-miR-629-3p/hsa-mir-629     | hsa-miR-629-3p/hsa-mir-629     | 0.9802861 |
| hsa-miR-653-5p/hsa-mir-653     | hsa-miR-653-5p/hsa-mir-653     | 0.9924738 |
| hsa-miR-653-3p/hsa-mir-653     | hsa-miR-653-3p/hsa-mir-653     | 0.9780757 |
| hsa-miR-6783-3p/hsa-mir-6783   | hsa-miR-6783-3p/hsa-mir-6783   | 0.9890980 |
| hsa-miR-6842-3p/hsa-mir-6842   | hsa-miR-6842-3p/hsa-mir-6842   | 0.9922759 |
| hsa-miR-708-5p/hsa-mir-708     | hsa-miR-708-5p/hsa-mir-708     | 0.9945612 |
| hsa-miR-708-3p/hsa-mir-708     | hsa-miR-708-3p/hsa-mir-708     | 0.9963956 |
| hsa-miR-7641/hsa-mir-7641-1    | hsa-miR-7641/hsa-mir-7641-1    | 0.9147837 |
| hsa-miR-7641/hsa-mir-7641-2    | hsa-miR-7641/hsa-mir-7641-2    | 0.9147837 |
| hsa-miR-767-5p/hsa-mir-767     | hsa-miR-767-5p/hsa-mir-767     | 0.9572567 |
| hsa-miR-769-5p/hsa-mir-769     | hsa-miR-769-5p/hsa-mir-769     | 0.9944529 |
| hsa-miR-7706/hsa-mir-7706      | hsa-miR-7706/hsa-mir-7706      | 0.8146557 |
| hsa-miR-7977/hsa-mir-7977      | hsa-miR-7977/hsa-mir-7977      | 0.9848125 |
| hsa-miR-877-3p/hsa-mir-877     | hsa-miR-877-3p/hsa-mir-877     | 0.8502057 |
| hsa-miR-9-5p/hsa-mir-9-1       | hsa-miR-9-5p/hsa-mir-9-1       | 0.9810371 |
| hsa-miR-9-3p/hsa-mir-9-1       | hsa-miR-9-3p/hsa-mir-9-1       | 0.9796678 |
| hsa-miR-9-5p/hsa-mir-9-2       | hsa-miR-9-5p/hsa-mir-9-2       | 0.9810466 |
| hsa-miR-9-3p/hsa-mir-9-2       | hsa-miR-9-3p/hsa-mir-9-2       | 0.9796678 |
| hsa-miR-9-5p/hsa-mir-9-3       | hsa-miR-9-5p/hsa-mir-9-3       | 0.9810408 |
| hsa-miR-9-3p/hsa-mir-9-3       | hsa-miR-9-3p/hsa-mir-9-3       | 0.9796674 |
| hsa-miR-92a-3p/hsa-mir-92a-1   | hsa-miR-92a-3p/hsa-mir-92a-1   | 0.9610949 |
| hsa-miR-92a-3p/hsa-mir-92a-2   | hsa-miR-92a-3p/hsa-mir-92a-2   | 0.9599375 |
| hsa-miR-92a-2-5p/hsa-mir-92a-2 | hsa-miR-92a-2-5p/hsa-mir-92a-2 | 0.9572441 |
| hsa-miR-92b-3p/hsa-mir-92b     | hsa-miR-92b-3p/hsa-mir-92b     | 0.8023038 |
| hsa-miR-93-3p/hsa-mir-93       | hsa-miR-93-3p/hsa-mir-93       | 0.9941327 |
| hsa-miR-935/hsa-mir-935        | hsa-miR-935/hsa-mir-935        | 0.9993773 |
| hsa-miR-941/hsa-mir-941-1      | hsa-miR-941/hsa-mir-941-1      | 0.9179860 |
| hsa-miR-941/hsa-mir-941-2      | hsa-miR-941/hsa-mir-941-2      | 0.9179860 |
| hsa-miR-941/hsa-mir-941-3      | hsa-miR-941/hsa-mir-941-3      | 0.9179860 |
| hsa-miR-941/hsa-mir-941-4      | hsa-miR-941/hsa-mir-941-4      | 0.9179860 |
| hsa-miR-941/hsa-mir-941-5      | hsa-miR-941/hsa-mir-941-5      | 0.9179860 |
| hsa-miR-99b-3p/hsa-mir-99b     | hsa-miR-99b-3p/hsa-mir-99b     | 0.9366968 |

[[4]]

|                                | NAME                           | MEM.SHIP  |
|--------------------------------|--------------------------------|-----------|
| hsa-miR-124-5p/hsa-mir-124-1   | hsa-miR-124-5p/hsa-mir-124-1   | 0.9997054 |
| hsa-miR-124-5p/hsa-mir-124-2   | hsa-miR-124-5p/hsa-mir-124-2   | 0.9997054 |
| hsa-miR-124-5p/hsa-mir-124-3   | hsa-miR-124-5p/hsa-mir-124-3   | 0.9997054 |
| hsa-miR-1251-5p/hsa-mir-1251   | hsa-miR-1251-5p/hsa-mir-1251   | 0.9898011 |
| hsa-miR-1264/hsa-mir-1264      | hsa-miR-1264/hsa-mir-1264      | 0.9997578 |
| hsa-miR-1283/hsa-mir-1283-1    | hsa-miR-1283/hsa-mir-1283-1    | 0.9993196 |
| hsa-miR-1283/hsa-mir-1283-2    | hsa-miR-1283/hsa-mir-1283-2    | 0.9993196 |
| hsa-miR-1298-5p/hsa-mir-1298   | hsa-miR-1298-5p/hsa-mir-1298   | 0.9999837 |
| hsa-miR-1298-3p/hsa-mir-1298   | hsa-miR-1298-3p/hsa-mir-1298   | 0.9991730 |
| hsa-miR-1303/hsa-mir-1303      | hsa-miR-1303/hsa-mir-1303      | 0.9996615 |
| hsa-miR-1323/hsa-mir-1323      | hsa-miR-1323/hsa-mir-1323      | 0.9998760 |
| hsa-miR-135a-5p/hsa-mir-135a-1 | hsa-miR-135a-5p/hsa-mir-135a-1 | 0.9982039 |
| hsa-miR-135a-5p/hsa-mir-135a-2 | hsa-miR-135a-5p/hsa-mir-135a-2 | 0.9981799 |
| hsa-miR-141-5p/hsa-mir-141     | hsa-miR-141-5p/hsa-mir-141     | 0.9983636 |
| hsa-miR-141-3p/hsa-mir-141     | hsa-miR-141-3p/hsa-mir-141     | 0.9962037 |
| hsa-miR-142-3p/hsa-mir-142     | hsa-miR-142-3p/hsa-mir-142     | 0.9822308 |
| hsa-miR-146a-5p/hsa-mir-146a   | hsa-miR-146a-5p/hsa-mir-146a   | 0.7951150 |
| hsa-miR-182-5p/hsa-mir-182     | hsa-miR-182-5p/hsa-mir-182     | 0.9885850 |
| hsa-miR-182-3p/hsa-mir-182     | hsa-miR-182-3p/hsa-mir-182     | 0.9997398 |
| hsa-miR-183-5p/hsa-mir-183     | hsa-miR-183-5p/hsa-mir-183     | 0.9975432 |
| hsa-miR-183-3p/hsa-mir-183     | hsa-miR-183-3p/hsa-mir-183     | 0.9994657 |
| hsa-miR-1911-5p/hsa-mir-1911   | hsa-miR-1911-5p/hsa-mir-1911   | 0.9976385 |
| hsa-miR-1912/hsa-mir-1912      | hsa-miR-1912/hsa-mir-1912      | 0.9956182 |
| hsa-miR-193b-3p/hsa-mir-193b   | hsa-miR-193b-3p/hsa-mir-193b   | 0.7862195 |
| hsa-miR-19a-3p/hsa-mir-19a     | hsa-miR-19a-3p/hsa-mir-19a     | 0.9732501 |



|                                |                                |           |
|--------------------------------|--------------------------------|-----------|
| hsa-miR-200a-5p/hsa-mir-200a   | hsa-miR-200a-5p/hsa-mir-200a   | 0.9974718 |
| hsa-miR-200a-3p/hsa-mir-200a   | hsa-miR-200a-3p/hsa-mir-200a   | 0.9964945 |
| hsa-miR-200b-5p/hsa-mir-200b   | hsa-miR-200b-5p/hsa-mir-200b   | 0.9678467 |
| hsa-miR-200b-3p/hsa-mir-200b   | hsa-miR-200b-3p/hsa-mir-200b   | 0.9996657 |
| hsa-miR-203b-3p/hsa-mir-203b   | hsa-miR-203b-3p/hsa-mir-203b   | 0.9809606 |
| hsa-miR-2113/hsa-mir-2113      | hsa-miR-2113/hsa-mir-2113      | 0.9561229 |
| hsa-miR-221-5p/hsa-mir-221     | hsa-miR-221-5p/hsa-mir-221     | 0.9663553 |
| hsa-miR-26a-2-3p/hsa-mir-26a-2 | hsa-miR-26a-2-3p/hsa-mir-26a-2 | 0.8116002 |
| hsa-miR-32-3p/hsa-mir-32       | hsa-miR-32-3p/hsa-mir-32       | 0.8022883 |
| hsa-miR-33b-3p/hsa-mir-33b     | hsa-miR-33b-3p/hsa-mir-33b     | 0.9601303 |
| hsa-miR-367-5p/hsa-mir-367     | hsa-miR-367-5p/hsa-mir-367     | 0.9994169 |
| hsa-miR-371a-3p/hsa-mir-371a   | hsa-miR-371a-3p/hsa-mir-371a   | 0.9462318 |
| hsa-miR-372-5p/hsa-mir-372     | hsa-miR-372-5p/hsa-mir-372     | 0.9641378 |
| hsa-miR-372-3p/hsa-mir-372     | hsa-miR-372-3p/hsa-mir-372     | 0.9676472 |
| hsa-miR-374a-3p/hsa-mir-374a   | hsa-miR-374a-3p/hsa-mir-374a   | 0.9889963 |
| hsa-miR-429/hsa-mir-429        | hsa-miR-429/hsa-mir-429        | 0.9997327 |
| hsa-miR-448/hsa-mir-448        | hsa-miR-448/hsa-mir-448        | 0.9998331 |
| hsa-miR-4517/hsa-mir-4517      | hsa-miR-4517/hsa-mir-4517      | 0.9851468 |
| hsa-miR-4792/hsa-mir-4792      | hsa-miR-4792/hsa-mir-4792      | 0.9821186 |
| hsa-miR-498/hsa-mir-498        | hsa-miR-498/hsa-mir-498        | 0.9990014 |
| hsa-miR-512-5p/hsa-mir-512-1   | hsa-miR-512-5p/hsa-mir-512-1   | 0.9989792 |
| hsa-miR-512-3p/hsa-mir-512-1   | hsa-miR-512-3p/hsa-mir-512-1   | 0.9977604 |
| hsa-miR-512-5p/hsa-mir-512-2   | hsa-miR-512-5p/hsa-mir-512-2   | 0.9989792 |
| hsa-miR-512-3p/hsa-mir-512-2   | hsa-miR-512-3p/hsa-mir-512-2   | 0.9977604 |
| hsa-miR-515-5p/hsa-mir-515-1   | hsa-miR-515-5p/hsa-mir-515-1   | 0.9981368 |
| hsa-miR-515-5p/hsa-mir-515-2   | hsa-miR-515-5p/hsa-mir-515-2   | 0.9981368 |
| hsa-miR-516a-5p/hsa-mir-516a-1 | hsa-miR-516a-5p/hsa-mir-516a-1 | 0.9928698 |
| hsa-miR-516a-5p/hsa-mir-516a-2 | hsa-miR-516a-5p/hsa-mir-516a-2 | 0.9928698 |
| hsa-miR-516b-5p/hsa-mir-516b-1 | hsa-miR-516b-5p/hsa-mir-516b-1 | 0.9994805 |
| hsa-miR-516b-5p/hsa-mir-516b-2 | hsa-miR-516b-5p/hsa-mir-516b-2 | 0.9998413 |
| hsa-miR-517a-3p/hsa-mir-517a   | hsa-miR-517a-3p/hsa-mir-517a   | 0.9997713 |
| hsa-miR-517b-3p/hsa-mir-517b   | hsa-miR-517b-3p/hsa-mir-517b   | 0.9997713 |
| hsa-miR-517c-3p/hsa-mir-517c   | hsa-miR-517c-3p/hsa-mir-517c   | 0.9993979 |
| hsa-miR-518a-3p/hsa-mir-518a-1 | hsa-miR-518a-3p/hsa-mir-518a-1 | 0.9986918 |
| hsa-miR-518a-3p/hsa-mir-518a-2 | hsa-miR-518a-3p/hsa-mir-518a-2 | 0.9986918 |
| hsa-miR-518b/hsa-mir-518b      | hsa-miR-518b/hsa-mir-518b      | 0.9996859 |
| hsa-miR-518c-5p/hsa-mir-518c   | hsa-miR-518c-5p/hsa-mir-518c   | 0.9989465 |
| hsa-miR-518c-3p/hsa-mir-518c   | hsa-miR-518c-3p/hsa-mir-518c   | 0.9998337 |
| hsa-miR-518d-5p/hsa-mir-518d   | hsa-miR-518d-5p/hsa-mir-518d   | 0.9999191 |
| hsa-miR-518e-5p/hsa-mir-518e   | hsa-miR-518e-5p/hsa-mir-518e   | 0.9989884 |
| hsa-miR-518e-3p/hsa-mir-518e   | hsa-miR-518e-3p/hsa-mir-518e   | 0.9996454 |
| hsa-miR-518f-5p/hsa-mir-518f   | hsa-miR-518f-5p/hsa-mir-518f   | 0.9999218 |
| hsa-miR-519a-5p/hsa-mir-519a-1 | hsa-miR-519a-5p/hsa-mir-519a-1 | 0.9990619 |
| hsa-miR-519a-3p/hsa-mir-519a-1 | hsa-miR-519a-3p/hsa-mir-519a-1 | 0.9982282 |
| hsa-miR-519a-3p/hsa-mir-519a-2 | hsa-miR-519a-3p/hsa-mir-519a-2 | 0.9982282 |
| hsa-miR-519b-5p/hsa-mir-519b   | hsa-miR-519b-5p/hsa-mir-519b   | 0.9989884 |
| hsa-miR-519b-3p/hsa-mir-519b   | hsa-miR-519b-3p/hsa-mir-519b   | 0.9992833 |
| hsa-miR-519c-5p/hsa-mir-519c   | hsa-miR-519c-5p/hsa-mir-519c   | 0.9989884 |
| hsa-miR-519c-3p/hsa-mir-519c   | hsa-miR-519c-3p/hsa-mir-519c   | 0.9990896 |
| hsa-miR-519d-3p/hsa-mir-519d   | hsa-miR-519d-3p/hsa-mir-519d   | 0.9993748 |
| hsa-miR-520a-5p/hsa-mir-520a   | hsa-miR-520a-5p/hsa-mir-520a   | 0.9998542 |
| hsa-miR-520a-3p/hsa-mir-520a   | hsa-miR-520a-3p/hsa-mir-520a   | 0.9994067 |
| hsa-miR-520b/hsa-mir-520b      | hsa-miR-520b/hsa-mir-520b      | 0.9986529 |
| hsa-miR-520c-5p/hsa-mir-520c   | hsa-miR-520c-5p/hsa-mir-520c   | 0.9999191 |
| hsa-miR-520c-3p/hsa-mir-520c   | hsa-miR-520c-3p/hsa-mir-520c   | 0.9987643 |
| hsa-miR-520d-5p/hsa-mir-520d   | hsa-miR-520d-5p/hsa-mir-520d   | 0.9994039 |
| hsa-miR-520d-3p/hsa-mir-520d   | hsa-miR-520d-3p/hsa-mir-520d   | 0.9988630 |
| hsa-miR-520e/hsa-mir-520e      | hsa-miR-520e/hsa-mir-520e      | 0.9998158 |
| hsa-miR-520f-3p/hsa-mir-520f   | hsa-miR-520f-3p/hsa-mir-520f   | 0.9992544 |
| hsa-miR-520g-5p/hsa-mir-520g   | hsa-miR-520g-5p/hsa-mir-520g   | 0.9996277 |
| hsa-miR-520g-3p/hsa-mir-520g   | hsa-miR-520g-3p/hsa-mir-520g   | 0.9988455 |
| hsa-miR-520h/hsa-mir-520h      | hsa-miR-520h/hsa-mir-520h      | 0.9987716 |
| hsa-miR-522-5p/hsa-mir-522     | hsa-miR-522-5p/hsa-mir-522     | 0.9989884 |
| hsa-miR-522-3p/hsa-mir-522     | hsa-miR-522-3p/hsa-mir-522     | 0.9991877 |

|                                |                                |           |
|--------------------------------|--------------------------------|-----------|
| hsa-miR-523-5p/hsa-mir-523     | hsa-miR-523-5p/hsa-mir-523     | 0.9989884 |
| hsa-miR-523-3p/hsa-mir-523     | hsa-miR-523-3p/hsa-mir-523     | 0.9988879 |
| hsa-miR-524-5p/hsa-mir-524     | hsa-miR-524-5p/hsa-mir-524     | 0.9999714 |
| hsa-miR-524-3p/hsa-mir-524     | hsa-miR-524-3p/hsa-mir-524     | 0.9980128 |
| hsa-miR-525-5p/hsa-mir-525     | hsa-miR-525-5p/hsa-mir-525     | 0.9995832 |
| hsa-miR-526a/hsa-mir-526a-1    | hsa-miR-526a/hsa-mir-526a-1    | 0.9999191 |
| hsa-miR-526a/hsa-mir-526a-2    | hsa-miR-526a/hsa-mir-526a-2    | 0.9999191 |
| hsa-miR-526b-5p/hsa-mir-526b   | hsa-miR-526b-5p/hsa-mir-526b   | 0.9994679 |
| hsa-miR-548ah-5p/hsa-mir-548ah | hsa-miR-548ah-5p/hsa-mir-548ah | 0.7919416 |
| hsa-miR-548ah-3p/hsa-mir-548ah | hsa-miR-548ah-3p/hsa-mir-548ah | 0.9697060 |
| hsa-miR-548am-3p/hsa-mir-548am | hsa-miR-548am-3p/hsa-mir-548am | 0.9123712 |
| hsa-miR-548f-3p/hsa-mir-548f-1 | hsa-miR-548f-3p/hsa-mir-548f-1 | 0.9955869 |
| hsa-miR-548f-3p/hsa-mir-548f-4 | hsa-miR-548f-3p/hsa-mir-548f-4 | 0.9985424 |
| hsa-miR-548p/hsa-mir-548p      | hsa-miR-548p/hsa-mir-548p      | 0.9135189 |
| hsa-miR-556-3p/hsa-mir-556     | hsa-miR-556-3p/hsa-mir-556     | 0.9964808 |
| hsa-miR-561-5p/hsa-mir-561     | hsa-miR-561-5p/hsa-mir-561     | 0.9629218 |
| hsa-miR-7974/hsa-mir-7974      | hsa-miR-7974/hsa-mir-7974      | 0.9962122 |
| hsa-miR-96-5p/hsa-mir-96       | hsa-miR-96-5p/hsa-mir-96       | 0.9999629 |

[[5]]

|                                | NAME                           | MEM.SHIP  |
|--------------------------------|--------------------------------|-----------|
| hsa-miR-107/hsa-mir-107        | hsa-miR-107/hsa-mir-107        | 0.9221811 |
| hsa-miR-1180-3p/hsa-mir-1180   | hsa-miR-1180-3p/hsa-mir-1180   | 0.9792134 |
| hsa-miR-1227-3p/hsa-mir-1227   | hsa-miR-1227-3p/hsa-mir-1227   | 0.9519243 |
| hsa-miR-1247-5p/hsa-mir-1247   | hsa-miR-1247-5p/hsa-mir-1247   | 0.9905833 |
| hsa-miR-1248/hsa-mir-1248      | hsa-miR-1248/hsa-mir-1248      | 0.9879350 |
| hsa-miR-125a-3p/hsa-mir-125a   | hsa-miR-125a-3p/hsa-mir-125a   | 0.9772363 |
| hsa-miR-126-5p/hsa-mir-126     | hsa-miR-126-5p/hsa-mir-126     | 0.8015695 |
| hsa-miR-126-3p/hsa-mir-126     | hsa-miR-126-3p/hsa-mir-126     | 0.9548090 |
| hsa-miR-1260a/hsa-mir-1260a    | hsa-miR-1260a/hsa-mir-1260a    | 0.8712928 |
| hsa-miR-1260b/hsa-mir-1260b    | hsa-miR-1260b/hsa-mir-1260b    | 0.9008200 |
| hsa-miR-1273d/hsa-mir-1273d    | hsa-miR-1273d/hsa-mir-1273d    | 0.9797365 |
| hsa-miR-1273g-3p/hsa-mir-1273g | hsa-miR-1273g-3p/hsa-mir-1273g | 0.9785359 |
| hsa-miR-128-3p/hsa-mir-128-1   | hsa-miR-128-3p/hsa-mir-128-1   | 0.9898361 |
| hsa-miR-128-3p/hsa-mir-128-2   | hsa-miR-128-3p/hsa-mir-128-2   | 0.9943083 |
| hsa-miR-1291/hsa-mir-1291      | hsa-miR-1291/hsa-mir-1291      | 0.8468690 |
| hsa-miR-1296-5p/hsa-mir-1296   | hsa-miR-1296-5p/hsa-mir-1296   | 0.9803247 |
| hsa-miR-1306-5p/hsa-mir-1306   | hsa-miR-1306-5p/hsa-mir-1306   | 0.9915009 |
| hsa-miR-1307-3p/hsa-mir-1307   | hsa-miR-1307-3p/hsa-mir-1307   | 0.9796124 |
| hsa-miR-1343-3p/hsa-mir-1343   | hsa-miR-1343-3p/hsa-mir-1343   | 0.9979470 |
| hsa-miR-140-3p/hsa-mir-140     | hsa-miR-140-3p/hsa-mir-140     | 0.9805221 |
| hsa-miR-146b-5p/hsa-mir-146b   | hsa-miR-146b-5p/hsa-mir-146b   | 0.9999527 |
| hsa-miR-149-5p/hsa-mir-149     | hsa-miR-149-5p/hsa-mir-149     | 0.9877905 |
| hsa-miR-188-5p/hsa-mir-188     | hsa-miR-188-5p/hsa-mir-188     | 0.9733501 |
| hsa-miR-1908-5p/hsa-mir-1908   | hsa-miR-1908-5p/hsa-mir-1908   | 0.9913885 |
| hsa-miR-193a-5p/hsa-mir-193a   | hsa-miR-193a-5p/hsa-mir-193a   | 0.9807344 |
| hsa-miR-196a-5p/hsa-mir-196a-1 | hsa-miR-196a-5p/hsa-mir-196a-1 | 0.9730400 |
| hsa-miR-196a-5p/hsa-mir-196a-2 | hsa-miR-196a-5p/hsa-mir-196a-2 | 0.9576564 |
| hsa-miR-197-3p/hsa-mir-197     | hsa-miR-197-3p/hsa-mir-197     | 0.8321653 |
| hsa-miR-199b-5p/hsa-mir-199b   | hsa-miR-199b-5p/hsa-mir-199b   | 0.8988989 |
| hsa-miR-210-3p/hsa-mir-210     | hsa-miR-210-3p/hsa-mir-210     | 0.8450248 |
| hsa-miR-2110/hsa-mir-2110      | hsa-miR-2110/hsa-mir-2110      | 0.8731308 |
| hsa-miR-26b-3p/hsa-mir-26b     | hsa-miR-26b-3p/hsa-mir-26b     | 0.9458140 |
| hsa-miR-27b-5p/hsa-mir-27b     | hsa-miR-27b-5p/hsa-mir-27b     | 0.7521569 |
| hsa-miR-3065-5p/hsa-mir-3065   | hsa-miR-3065-5p/hsa-mir-3065   | 0.9255444 |
| hsa-miR-30c-2-3p/hsa-mir-30c-2 | hsa-miR-30c-2-3p/hsa-mir-30c-2 | 0.9773211 |
| hsa-miR-3127-3p/hsa-mir-3127   | hsa-miR-3127-3p/hsa-mir-3127   | 0.9817040 |
| hsa-miR-3188/hsa-mir-3188      | hsa-miR-3188/hsa-mir-3188      | 0.9619329 |
| hsa-miR-320c/hsa-mir-320c-1    | hsa-miR-320c/hsa-mir-320c-1    | 0.7598922 |
| hsa-miR-320c/hsa-mir-320c-2    | hsa-miR-320c/hsa-mir-320c-2    | 0.7623246 |
| hsa-miR-323a-3p/hsa-mir-323a   | hsa-miR-323a-3p/hsa-mir-323a   | 0.9881288 |
| hsa-miR-324-3p/hsa-mir-324     | hsa-miR-324-3p/hsa-mir-324     | 0.9988118 |
| hsa-miR-339-3p/hsa-mir-339     | hsa-miR-339-3p/hsa-mir-339     | 0.7810893 |
| hsa-miR-340-3p/hsa-mir-340     | hsa-miR-340-3p/hsa-mir-340     | 0.9993712 |

|                                  |                                  |           |
|----------------------------------|----------------------------------|-----------|
| hsa-miR-342-5p/hsa-mir-342       | hsa-miR-342-5p/hsa-mir-342       | 0.9718513 |
| hsa-miR-342-3p/hsa-mir-342       | hsa-miR-342-3p/hsa-mir-342       | 0.9147119 |
| hsa-miR-3605-3p/hsa-mir-3605     | hsa-miR-3605-3p/hsa-mir-3605     | 0.7696339 |
| hsa-miR-361-3p/hsa-mir-361       | hsa-miR-361-3p/hsa-mir-361       | 0.8573756 |
| hsa-miR-3613-5p/hsa-mir-3613     | hsa-miR-3613-5p/hsa-mir-3613     | 0.9881144 |
| hsa-miR-3615/hsa-mir-3615        | hsa-miR-3615/hsa-mir-3615        | 0.9810972 |
| hsa-miR-3651/hsa-mir-3651        | hsa-miR-3651/hsa-mir-3651        | 0.9549179 |
| hsa-miR-381-3p/hsa-mir-381       | hsa-miR-381-3p/hsa-mir-381       | 0.9168266 |
| hsa-miR-3909/hsa-mir-3909        | hsa-miR-3909/hsa-mir-3909        | 0.9624546 |
| hsa-miR-409-3p/hsa-mir-409       | hsa-miR-409-3p/hsa-mir-409       | 0.9999970 |
| hsa-miR-421/hsa-mir-421          | hsa-miR-421/hsa-mir-421          | 0.9995660 |
| hsa-miR-423-5p/hsa-mir-423       | hsa-miR-423-5p/hsa-mir-423       | 0.9656020 |
| hsa-miR-4448/hsa-mir-4448        | hsa-miR-4448/hsa-mir-4448        | 0.9897025 |
| hsa-miR-4449/hsa-mir-4449        | hsa-miR-4449/hsa-mir-4449        | 0.8720678 |
| hsa-miR-4488/hsa-mir-4488        | hsa-miR-4488/hsa-mir-4488        | 0.9999991 |
| hsa-miR-455-5p/hsa-mir-455       | hsa-miR-455-5p/hsa-mir-455       | 0.8977847 |
| hsa-miR-455-3p/hsa-mir-455       | hsa-miR-455-3p/hsa-mir-455       | 0.8482420 |
| hsa-miR-4728-3p/hsa-mir-4728     | hsa-miR-4728-3p/hsa-mir-4728     | 0.9513783 |
| hsa-miR-484/hsa-mir-484          | hsa-miR-484/hsa-mir-484          | 0.9805820 |
| hsa-miR-500b-3p/hsa-mir-500b     | hsa-miR-500b-3p/hsa-mir-500b     | 0.9567633 |
| hsa-miR-508-5p/hsa-mir-508       | hsa-miR-508-5p/hsa-mir-508       | 0.8026625 |
| hsa-miR-532-5p/hsa-mir-532       | hsa-miR-532-5p/hsa-mir-532       | 0.9382906 |
| hsa-miR-532-3p/hsa-mir-532       | hsa-miR-532-3p/hsa-mir-532       | 0.8512450 |
| hsa-miR-543/hsa-mir-543          | hsa-miR-543/hsa-mir-543          | 0.9897456 |
| hsa-miR-550a-5p/hsa-mir-550a-1   | hsa-miR-550a-5p/hsa-mir-550a-1   | 0.9991675 |
| hsa-miR-550a-3-5p/hsa-mir-550a-1 | hsa-miR-550a-3-5p/hsa-mir-550a-1 | 0.9991675 |
| hsa-miR-550a-5p/hsa-mir-550a-2   | hsa-miR-550a-5p/hsa-mir-550a-2   | 0.9991675 |
| hsa-miR-550a-3-5p/hsa-mir-550a-2 | hsa-miR-550a-3-5p/hsa-mir-550a-2 | 0.9991675 |
| hsa-miR-574-5p/hsa-mir-574       | hsa-miR-574-5p/hsa-mir-574       | 0.8660486 |
| hsa-miR-625-5p/hsa-mir-625       | hsa-miR-625-5p/hsa-mir-625       | 0.9642176 |
| hsa-miR-642a-5p/hsa-mir-642a     | hsa-miR-642a-5p/hsa-mir-642a     | 0.9802768 |
| hsa-miR-642a-3p/hsa-mir-642a     | hsa-miR-642a-3p/hsa-mir-642a     | 0.9822368 |
| hsa-miR-6511a-3p/hsa-mir-6511a-1 | hsa-miR-6511a-3p/hsa-mir-6511a-1 | 0.9990005 |
| hsa-miR-6511a-3p/hsa-mir-6511a-2 | hsa-miR-6511a-3p/hsa-mir-6511a-2 | 0.9990005 |
| hsa-miR-6511a-3p/hsa-mir-6511a-3 | hsa-miR-6511a-3p/hsa-mir-6511a-3 | 0.9990005 |
| hsa-miR-6511a-3p/hsa-mir-6511a-4 | hsa-miR-6511a-3p/hsa-mir-6511a-4 | 0.9990005 |
| hsa-miR-6511b-3p/hsa-mir-6511b-1 | hsa-miR-6511b-3p/hsa-mir-6511b-1 | 0.9903945 |
| hsa-miR-6511b-3p/hsa-mir-6511b-2 | hsa-miR-6511b-3p/hsa-mir-6511b-2 | 0.9901786 |
| hsa-miR-654-3p/hsa-mir-654       | hsa-miR-654-3p/hsa-mir-654       | 0.9633188 |
| hsa-miR-671-5p/hsa-mir-671       | hsa-miR-671-5p/hsa-mir-671       | 0.8896201 |
| hsa-miR-6808-3p/hsa-mir-6808     | hsa-miR-6808-3p/hsa-mir-6808     | 0.7527699 |
| hsa-miR-6866-5p/hsa-mir-6866     | hsa-miR-6866-5p/hsa-mir-6866     | 0.9957405 |
| hsa-miR-760/hsa-mir-760          | hsa-miR-760/hsa-mir-760          | 0.9691277 |
| hsa-miR-766-5p/hsa-mir-766       | hsa-miR-766-5p/hsa-mir-766       | 0.9897916 |
| hsa-miR-766-3p/hsa-mir-766       | hsa-miR-766-3p/hsa-mir-766       | 0.8049953 |
| hsa-miR-769-3p/hsa-mir-769       | hsa-miR-769-3p/hsa-mir-769       | 0.9087774 |
| hsa-miR-877-5p/hsa-mir-877       | hsa-miR-877-5p/hsa-mir-877       | 0.9133595 |
| hsa-miR-885-5p/hsa-mir-885       | hsa-miR-885-5p/hsa-mir-885       | 0.9778039 |
| hsa-miR-943/hsa-mir-943          | hsa-miR-943/hsa-mir-943          | 0.8011582 |
