# Supplementary material for: Identification of the miRNAome of early mesoderm progenitor cells and cardiomyocytes derived from human pluripotent stem cells
Source: PubMed Central journal article supplement (PMC5966391; doi:10.1038/s41598-018-26156-3), 2018-05-23
Supplement: 41598_2018_26156_MOESM8_ESM.pdf [file 41598_2018_26156_MOESM8_ESM.pdf]

# Identification of the miRNAome of early mesoderm progenitor cells and cardiomyocytes derived from human pluripotent stem cells

Ximena Garate<sup>1</sup>, Alejandro La Greca<sup>1</sup>, Gabriel Neiman<sup>1</sup>, Carolina Blüguermann<sup>1</sup>, Natalia L. Santín Velazque<sup>1</sup>, Lucía N. Moro<sup>1</sup>, Carlos Luzzani<sup>1</sup>, Elida Scassa<sup>1</sup>, Gustavo E. Sevlever<sup>1</sup>, Leonardo Romorini<sup>1</sup>, and Santiago G. Miriuka<sup>1\*</sup>

<sup>1</sup>LIAN-CONICET, FLENI - Ruta 9 km 52.5 - Belen de Escobar, Provincia de Buenos Aires, Argentina

\*smiriuka@fleni.org.ar

## ABSTRACT

miRBase precursor : hsa-mir-302a  
 Total read count : 458107  
 hsa-miR-302a-5p read count 409544  
 hsa-miR-302a-3p read count 44324  
 remaining reads : 4238

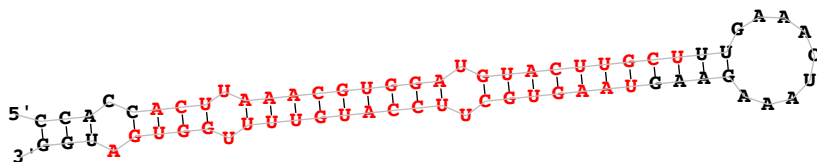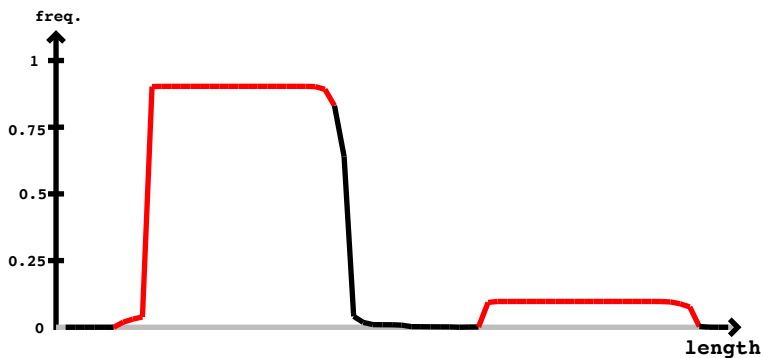

hsa-miR-302a-5p

hsa-miR-302a-3p

| 5' -                                                                 | reads | mm | exp | sample |
|----------------------------------------------------------------------|-------|----|-----|--------|
| ccaccacuuuaaacguggauguacuugcuuugaaacuaaagaaguaagucuccauguuuuggugaugg |       |    |     |        |
| (((.(((.(((((((.(((((((.(.....)))))))))))).)))))))).)))))))).))))))  |       |    |     |        |
| ...cacuuuaaacguggauguacuug.....                                      | 1     | 0  |     | seq    |
| ...acuuaaGcguggauguac.....                                           | 1     | 1  |     | seq    |
| ...acuuaaacguggauguac.....                                           | 25    | 0  |     | seq    |
| ...acuuaaacguggauguacu.....                                          | 25    | 0  |     | seq    |
| ...acuuaaacguggauguacuu.....                                         | 448   | 0  |     | seq    |
| ...acuuaaacguggauguaUuu.....                                         | 1     | 1  |     | seq    |
| ...acCuuaaacguggauguacu.....                                         | 1     | 1  |     | seq    |
| ...acuuUaacguggauguacu.....                                          | 1     | 1  |     | seq    |
| ...Gcuuaaacguggauguacu.....                                          | 1     | 1  |     | seq    |
| ...aAuuaaacguggauguacu.....                                          | 1     | 1  |     | seq    |
| ...aGuuaaacguggauguacu.....                                          | 1     | 1  |     | seq    |
| ...acuuaaGcguggauguacu.....                                          | 2     | 1  |     | seq    |
| ...acuuaaacguggauguacuG.....                                         | 6     | 1  |     | seq    |
| ...acuuaaacguggGuguacu.....                                          | 4     | 1  |     | seq    |
| ...acuuaaacAuggugauguacu.....                                        | 1     | 1  |     | seq    |
| ...acuuaaacguggaugCacuu.....                                         | 1     | 1  |     | seq    |
| ...acuAaacguggauguacu.....                                           | 1     | 1  |     | seq    |
| ...acuuaaacguggauguacuA.....                                         | 1     | 1  |     | seq    |
| ...acuuaaacguggauguacuC.....                                         | 6     | 1  |     | seq    |
| ...acuuaaacguggauguGcuu.....                                         | 1     | 1  |     | seq    |
| ...acuuaaacgugUauguacuug.....                                        | 1     | 1  |     | seq    |
| ...acuuaaacguggGuguacuug.....                                        | 15    | 1  |     | seq    |
| ...acuCaaacguggauguacuug.....                                        | 6     | 1  |     | seq    |
| ...acuuaaacguAgaugacuug.....                                         | 1     | 1  |     | seq    |
| ...acuuaaGcguggauguacuug.....                                        | 11    | 1  |     | seq    |
| ...acuuaaUcguggauguacuug.....                                        | 1     | 1  |     | seq    |
| ...acAuuaaacguggauguacuug.....                                       | 2     | 1  |     | seq    |
| ...acuuaaacguggaCguacuug.....                                        | 6     | 1  |     | seq    |
| ...acuuaaacAuggugauguacuug.....                                      | 4     | 1  |     | seq    |
| ...Ucuuaaacguggauguacuug.....                                        | 2     | 1  |     | seq    |
| ...acCuuaaacguggauguacuug.....                                       | 8     | 1  |     | seq    |
| ...acuuaaacguggaGguacuug.....                                        | 6     | 1  |     | seq    |
| ...acuuaaacguggauguacuC.....                                         | 4     | 1  |     | seq    |
| ...acuuaaacguggauguaAuug.....                                        | 1     | 1  |     | seq    |

ccaccacuuuaaacguggauguacuugcuuugaaacuaaagaaguaagugcuuccauguuuuggugaugg

|                                     |      |   |     |
|-------------------------------------|------|---|-----|
| .....aUuuaaacguggauguacuug.....     | 1    | 1 | seq |
| .....acuuaaacguggauguacAug.....     | 2    | 1 | seq |
| .....acuuaaacguggauguacCug.....     | 9    | 1 | seq |
| .....acuuUaacguggauguacuug.....     | 1    | 1 | seq |
| .....acuuaaacguggauguacuU.....      | 2    | 1 | seq |
| .....acuuaaacgugAauguacuug.....     | 2    | 1 | seq |
| .....acuuaaaUguggauguacuug.....     | 5    | 1 | seq |
| .....acuuaaacguUguggauguacuug.....  | 2    | 1 | seq |
| .....acuuaaacguggauguacuUA.....     | 7    | 1 | seq |
| .....aUuuaaacguggauguacuug.....     | 1    | 1 | seq |
| .....acuuaaacguggauguacuGg.....     | 6    | 1 | seq |
| .....acuuaaacguggUugguacuug.....    | 2    | 1 | seq |
| .....acuuGaacguggauguacuug.....     | 10   | 1 | seq |
| .....acuuaaacguggauUuacuug.....     | 2    | 1 | seq |
| .....acuuaaacgCggaugguacuug.....    | 8    | 1 | seq |
| .....acuuaaacguggaAguacuug.....     | 1    | 1 | seq |
| .....acuuaaacguggauguGcuug.....     | 7    | 1 | seq |
| .....acuuaaacguggauguaUuug.....     | 3    | 1 | seq |
| .....aGuuaaacguggauguacuug.....     | 3    | 1 | seq |
| .....acuuaaacguggauUuacuug.....     | 1    | 1 | seq |
| .....acuuaaacguggauguacuug.....     | 3066 | 0 | seq |
| .....acuuGacguggauguacuug.....      | 6    | 1 | seq |
| .....Gcuuaaacguggauguacuug.....     | 12   | 1 | seq |
| .....acuuaaacguggauguacuCg.....     | 13   | 1 | seq |
| .....acuuaaacguggaugCacuug.....     | 8    | 1 | seq |
| .....acuuaaacgAgggaugguacuug.....   | 1    | 1 | seq |
| .....acuuaaacguggCuguacuug.....     | 1    | 1 | seq |
| .....acuuaaacguggaGguacuugc.....    | 3    | 1 | seq |
| .....acuuaaacgCggaugguacuugc.....   | 12   | 1 | seq |
| .....acuuaaacguggauguacuAgc.....    | 1    | 1 | seq |
| .....acuAaacguggauguacuugc.....     | 1    | 1 | seq |
| .....acuuaaacguUguggauguacuugc..... | 6    | 1 | seq |
| .....acuuaaacAugggaugguacuugc.....  | 3    | 1 | seq |
| .....Gcuuaaacguggauguacuugc.....    | 21   | 1 | seq |
| .....acuuCaacguggauguacuugc.....    | 1    | 1 | seq |
| .....acuuGaacguggauguacuugc.....    | 8    | 1 | seq |
| .....acuuaaGcguggauguacuugc.....    | 7    | 1 | seq |
| .....acCuaaacguggauguacuugc.....    | 18   | 1 | seq |
| .....acuuaaacgGggaugguacuugc.....   | 1    | 1 | seq |
| .....acuuaaCcguggauguacuugc.....    | 3    | 1 | seq |
| .....acuuaaacgugAauguacuugc.....    | 4    | 1 | seq |
| .....acuuaaacguggauguacuugc.....    | 1    | 1 | seq |
| .....acuuaaacguggauguacuGgc.....    | 3    | 1 | seq |
| .....acuuGacguggauguacuugc.....     | 12   | 1 | seq |
| .....acuuaaacgugUauguacuugc.....    | 1    | 1 | seq |
| .....acuuaaacguggauUuacuugc.....    | 2    | 1 | seq |
| .....acuuaaacguggauguacuCgc.....    | 8    | 1 | seq |
| .....acGuaaacguggauguacuugc.....    | 1    | 1 | seq |
| .....acuuaaacguggGguacuugc.....     | 21   | 1 | seq |
| .....aUuuaaacguggauguacuugc.....    | 2    | 1 | seq |
| .....aGuuaaacguggauguacuugc.....    | 4    | 1 | seq |
| .....acuuaaacguggaAguacuugc.....    | 3    | 1 | seq |
| .....acuuaaacguggauguacuUc.....     | 1    | 1 | seq |
| .....Ucuuaaacguggauguacuugc.....    | 4    | 1 | seq |
| .....acuuaaacgAgggaugguacuugc.....  | 2    | 1 | seq |
| .....acuuaaacguggauguacuugc.....    | 4673 | 0 | seq |
| .....acuuaaacguggauguacuAugc.....   | 6    | 1 | seq |
| .....acuuaaacguAgaugguacuugc.....   | 3    | 1 | seq |
| .....acuuaaacguggauguacuUAc.....    | 4    | 1 | seq |
| .....acuuaaacguggauguacuUuugc.....  | 6    | 1 | seq |
| .....acuuaaacguggaugCacuugc.....    | 4    | 1 | seq |
| .....aUuuaaacguggauguacuugc.....    | 2    | 1 | seq |
| .....acuuaaacguggUugguacuugc.....   | 2    | 1 | seq |
| .....acuuaaacguggaCguacuugc.....    | 16   | 1 | seq |
| .....acuuaaacguggauguGcuugc.....    | 7    | 1 | seq |
| .....acuuaaaUguggauguacuugc.....    | 2    | 1 | seq |
| .....acuuaaacguggauguacuugU.....    | 7    | 1 | seq |
| .....acuuaaacguggauguacuCgc.....    | 11   | 1 | seq |
| .....acAuaaacguggauguacuugc.....    | 4    | 1 | seq |

ccaccacuuuaacguggauguacuugcuuugaaacuaaagaaguaagugcuuccauguuuuggugaugg

|                                       |      |   |     |
|---------------------------------------|------|---|-----|
| .....Ccuuaaacguggauguacuugc.....      | 2    | 1 | seq |
| .....acuuuaacguggauguCuugc.....       | 2    | 1 | seq |
| .....acuCaaacguggauguacuugc.....      | 10   | 1 | seq |
| .....acuuuaacCuggauguacuugc.....      | 1    | 1 | seq |
| .....acuuuaacguggauguacuugcC.....     | 1    | 1 | seq |
| .....acuuuaacguggauguacuugcu.....     | 22   | 0 | seq |
| .....acuCaaacguggauguacuugcu.....     | 1    | 1 | seq |
| .....acuuuaacguggauguacuugcCugcu..... | 1    | 1 | seq |
| .....acuuuaacguggauguacuugcG.....     | 1    | 1 | seq |
| .....acuuuaacguggauguacuugcA.....     | 1    | 1 | seq |
| .....acuuuaacguggauguacuugcUA.....    | 3    | 1 | seq |
| .....acCuuaaacguggauguacuugcuu.....   | 1    | 1 | seq |
| .....aUuuuaacguggauguacuugcuu.....    | 1    | 1 | seq |
| .....acuuuaacguggauguacuugcuuu.....   | 1    | 0 | seq |
| .....cuuaaacguggauguacu.....          | 4    | 0 | seq |
| .....cuuaaacguggauguacu.....          | 10   | 0 | seq |
| .....cuuaaacguggauguacuug.....        | 200  | 0 | seq |
| .....Uuuuaacguggauguacuug.....        | 1    | 1 | seq |
| .....cuuaaacGguggauguacuug.....       | 1    | 1 | seq |
| .....cCuuaaacguggauguacuug.....       | 1    | 1 | seq |
| .....cuuaaacguggGugugacuug.....       | 1    | 1 | seq |
| .....cuuaaacguAuggauguacuug.....      | 1    | 1 | seq |
| .....Guuaaacguggauguacuug.....        | 1    | 1 | seq |
| .....cuuaaacguggauguacuAgc.....       | 1    | 1 | seq |
| .....cuuaaacguggauguacuugU.....       | 10   | 1 | seq |
| .....cuuaaacguggauguCuugc.....        | 1    | 1 | seq |
| .....cuuaaacguggauguacuAugc.....      | 2    | 1 | seq |
| .....Auuaaacguggauguacuugc.....       | 2    | 1 | seq |
| .....cuuaaacguggauguacuugc.....       | 4187 | 0 | seq |
| .....cuuaaacGguggauguacuugc.....      | 2    | 1 | seq |
| .....cuuaaacguggauguacuugCugc.....    | 9    | 1 | seq |
| .....cuuaaacGguggauguacuugc.....      | 3    | 1 | seq |
| .....cuuaaacgugAauguacuugc.....       | 2    | 1 | seq |
| .....cuAaacguggauguacuugc.....        | 1    | 1 | seq |
| .....Uuuuaacguggauguacuugc.....       | 7    | 1 | seq |
| .....cuuaaacguggauguacuugc.....       | 1    | 1 | seq |
| .....cuuaaacguggauguacuugc.....       | 1    | 1 | seq |
| .....cuuaaacguggauguUcuugc.....       | 1    | 1 | seq |
| .....cuuaaacguAuggauguacuugc.....     | 5    | 1 | seq |
| .....cuuaaacguggaCguacuugc.....       | 13   | 1 | seq |
| .....cGuuaaacguggauguacuugc.....      | 1    | 1 | seq |
| .....cuCaaacguggauguacuugc.....       | 4    | 1 | seq |
| .....cuuaaacguggaGguacuugc.....       | 2    | 1 | seq |
| .....cuuaaacguggauguacuAc.....        | 6    | 1 | seq |
| .....cuuaaacguggauguacuugA.....       | 4    | 1 | seq |
| .....cuuaaaUguggauguacuugc.....       | 7    | 1 | seq |
| .....cuuaaGcuggauguacuugc.....        | 8    | 1 | seq |
| .....cuuaaacguUguggauguacuugc.....    | 2    | 1 | seq |
| .....cCuuaaacguggauguacuugc.....      | 14   | 1 | seq |
| .....cuuaaCguggauguacuugc.....        | 1    | 1 | seq |
| .....cuuaaacguggauguGcuugc.....       | 16   | 1 | seq |
| .....cuuaaacgAggugauguacuugc.....     | 1    | 1 | seq |
| .....cuuaGacguggauguacuugc.....       | 10   | 1 | seq |
| .....cuuaaacguggauguacuCgc.....       | 12   | 1 | seq |
| .....cuuaaacguggauguaUuugc.....       | 2    | 1 | seq |
| .....cuuaaacguggGugugacuugc.....      | 10   | 1 | seq |
| .....cuuaaacguggauguacuCc.....        | 1    | 1 | seq |
| .....cuuaaacguggaAguacuugc.....       | 1    | 1 | seq |
| .....cuuaaacguggauguacuGgc.....       | 1    | 1 | seq |
| .....cuuaaacguggaugCacuugc.....       | 11   | 1 | seq |
| .....cuuaaacguCguggauguacuugc.....    | 1    | 1 | seq |
| .....Guuaaacguggauguacuugc.....       | 6    | 1 | seq |
| .....cuuGaacguggauguacuugc.....       | 5    | 1 | seq |
| .....cuuaaacAuggugauguacuugc.....     | 3    | 1 | seq |
| .....cAuuaaacguggauguacuugc.....      | 3    | 1 | seq |
| .....cuuaaacguggauAuacuugc.....       | 6    | 1 | seq |
| .....cuuaaacguggaugAacuugcu.....      | 1    | 1 | seq |
| .....cuuaaacguggauguUcuugcu.....      | 1    | 1 | seq |
| .....cuuaaacguggauguacuugUu.....      | 2    | 1 | seq |

ccaccacuuuaacguggauguacuugcuuugaaacuaaagaaguaagugcuuccauguuuuggugaugg

|                                     |     |   |     |
|-------------------------------------|-----|---|-----|
| ..... cuuaaacgCggauguacuugcu.....   | 3   | 1 | seq |
| ..... cuuaaacguggaAguacuugcu.....   | 1   | 1 | seq |
| ..... cuuaaacguggauguacuugcC.....   | 2   | 1 | seq |
| ..... cuuaaacguggauguGcuugcu.....   | 1   | 1 | seq |
| ..... cuuaaacguggauguacuugcu.....   | 548 | 0 | seq |
| ..... cuuaaacguggauguacuugcG.....   | 4   | 1 | seq |
| ..... cuuaaacguggaugCacuugcu.....   | 2   | 1 | seq |
| ..... cuuaaacguggGuguacuugcu.....   | 1   | 1 | seq |
| ..... cuuaaacguggauguacuugAu.....   | 1   | 1 | seq |
| ..... cuuaGacguggauguacuugcu.....   | 1   | 1 | seq |
| ..... cuuaaGcguggauguacuugcu.....   | 1   | 1 | seq |
| ..... cuuaaacguAgauguacuugcu.....   | 2   | 1 | seq |
| ..... cuuaaacguggauguacuUAcu.....   | 1   | 1 | seq |
| ..... CUaaacguggauguacuugcu.....    | 2   | 1 | seq |
| ..... cGuaaacguggauguacuugcu.....   | 2   | 1 | seq |
| ..... cuuaaacguggaCguacuugcu.....   | 4   | 1 | seq |
| ..... cAuaaacguggauguacuugcu.....   | 1   | 1 | seq |
| ..... cuCaacguggauguacuugcu.....    | 2   | 1 | seq |
| ..... cuuaaaaUguggauguacuugcu.....  | 1   | 1 | seq |
| ..... cuuaaacguggauguacuugGu.....   | 1   | 1 | seq |
| ..... cuuaaacguggauguacuCgcu.....   | 2   | 1 | seq |
| ..... cuuaaacguggauguacuugcuA.....  | 8   | 1 | seq |
| ..... cuuaGacguggauguacuugcuu.....  | 1   | 1 | seq |
| ..... cuuaaacguggauguacuugcuG.....  | 1   | 1 | seq |
| ..... cGuaaacguggauguacuugcuu.....  | 1   | 1 | seq |
| ..... cuuaaacguggauguacuugcuu.....  | 35  | 0 | seq |
| ..... cuuaaacguggauguacuugcuC.....  | 1   | 1 | seq |
| ..... cuuaaacguggauguacuugcuuG..... | 1   | 1 | seq |
| ..... cuuaaacguggauguacuugcuuu..... | 3   | 0 | seq |
| ..... cuuaaacguggauguacuugcuuA..... | 2   | 1 | seq |
| ..... cCUaaacguggauguacuugcuu.....  | 1   | 1 | seq |
| ..... cuuaaacguggauguacuugcuuU..... | 1   | 1 | seq |
| ..... uuaaacguggauguacu.....        | 3   | 0 | seq |
| ..... uuaaacguggauguacuug.....      | 43  | 0 | seq |
| ..... uuaaacguggauguacuCugc.....    | 5   | 1 | seq |
| ..... uuaaacguggauguGcuugc.....     | 3   | 1 | seq |
| ..... uuaaacguggauguacuCu.....      | 1   | 1 | seq |
| ..... Guaaacguggauguacuugc.....     | 1   | 1 | seq |
| ..... uuaaCcguggauguacuugc.....     | 1   | 1 | seq |
| ..... uuaaacgAggauguacuugc.....     | 1   | 1 | seq |
| ..... uuaaacguCgauguacuugc.....     | 1   | 1 | seq |
| ..... uuaaacguggauguacuAc.....      | 1   | 1 | seq |
| ..... uuaCacguggauguacuugc.....     | 1   | 1 | seq |
| ..... uuaaacguggaugCacuugc.....     | 1   | 1 | seq |
| ..... uuaaacguggaAguacuugc.....     | 1   | 1 | seq |
| ..... uuaaacguggauguacuugU.....     | 1   | 1 | seq |
| ..... uuaaacgugAauguacuugc.....     | 1   | 1 | seq |
| ..... uuaaacgCggauguacuugc.....     | 2   | 1 | seq |
| ..... uuaaacguggauguacuugc.....     | 904 | 0 | seq |
| ..... uuaaacAuggauguacuugc.....     | 2   | 1 | seq |
| ..... CUaaacguggauguacuugc.....     | 10  | 1 | seq |
| ..... uuaaacguggGuguacuugc.....     | 4   | 1 | seq |
| ..... uuGaacguggauguacuugc.....     | 2   | 1 | seq |
| ..... uuaaacguAgauguacuugc.....     | 1   | 1 | seq |
| ..... uuaaacguggauguacuAgc.....     | 1   | 1 | seq |
| ..... uuaaacguggauguacuCgc.....     | 2   | 1 | seq |
| ..... uuaaaaUguggauguacuugc.....    | 1   | 1 | seq |
| ..... uCaacguggauguacuugc.....      | 1   | 1 | seq |
| ..... uuaaacguggaugAacuugc.....     | 1   | 1 | seq |
| ..... uuaaacguggaCguacuugc.....     | 6   | 1 | seq |
| ..... uuaGacguggauguacuugc.....     | 1   | 1 | seq |
| ..... uuaaacguggGuguacuugcu.....    | 7   | 1 | seq |
| ..... uuaaacguggauguacuGugcu.....   | 1   | 1 | seq |
| ..... uuaaacguggUguacuugcu.....     | 2   | 1 | seq |
| ..... uuaaacguggauguUuugcu.....     | 3   | 1 | seq |
| ..... uuaaacgugAauguacuugcu.....    | 1   | 1 | seq |
| ..... uuaaacguggauguacuugcC.....    | 19  | 1 | seq |
| ..... uuaaacguggauguacuUcu.....     | 1   | 1 | seq |
| ..... uuaaCcguggauguacuugcu.....    | 1   | 1 | seq |

ccaccacuuuaacguggauguacuugcuuugaaacuaaagaaguaagugcuuccauguuuuggugaugg

|                                     |      |   |     |
|-------------------------------------|------|---|-----|
| .....uuaaacguggauguacuugcG.....     | 11   | 1 | seq |
| .....uuaaacguggaugAacuugcu.....     | 2    | 1 | seq |
| .....Guaaacguggauguacuugcu.....     | 2    | 1 | seq |
| .....uuaaacguggauguacuAgcu.....     | 1    | 1 | seq |
| .....uCaaacguggauguacuugcu.....     | 9    | 1 | seq |
| .....uuaaacguggaugCacuugcu.....     | 6    | 1 | seq |
| .....uuaaacguggaAguacuugcu.....     | 2    | 1 | seq |
| .....Auaaacguggauguacuugcu.....     | 3    | 1 | seq |
| .....uuaaacguggauguacuugAu.....     | 3    | 1 | seq |
| .....uuaaacguggaCguacuugcu.....     | 5    | 1 | seq |
| .....uuUaacguggauguacuugcu.....     | 2    | 1 | seq |
| .....uuaaacguggauguacuCgcu.....     | 7    | 1 | seq |
| .....uuaaacguggauguacuugGu.....     | 2    | 1 | seq |
| .....uuaaacguggauCuacuugcu.....     | 1    | 1 | seq |
| .....uAaaacguggauguacuugcu.....     | 2    | 1 | seq |
| .....uuaaacAuggauguacuugcu.....     | 2    | 1 | seq |
| .....uuaaacgCggaugacuugcu.....      | 2    | 1 | seq |
| .....uuuCaacguggauguacuugcu.....    | 3    | 1 | seq |
| .....uuaaacguggauguacuugcA.....     | 6    | 1 | seq |
| .....uuaaacguggauguacuAuu.....      | 3    | 1 | seq |
| .....uuuUaacguggauguacuugcu.....    | 1    | 1 | seq |
| .....uuaaacguggauguacuugUu.....     | 4    | 1 | seq |
| .....uuuuuUguggauguacuugcu.....     | 2    | 1 | seq |
| .....uuaaacguUgaguacuugcu.....      | 1    | 1 | seq |
| .....uuaaacguCgaguacuugcu.....      | 3    | 1 | seq |
| .....uuaaacguggauguacuugcu.....     | 2389 | 0 | seq |
| .....uuaaacCuggauguacuugcu.....     | 1    | 1 | seq |
| .....uuaaacguAgaugacuugcu.....      | 1    | 1 | seq |
| .....uuuuuAuggauguacuugcu.....      | 3    | 1 | seq |
| .....uuGaacguggauguacuugcu.....     | 3    | 1 | seq |
| .....uuuuuAuggauguacuugcu.....      | 1    | 1 | seq |
| .....uuaaacguggauguGcuugcu.....     | 5    | 1 | seq |
| .....uuaaacguggauguacuugcu.....     | 10   | 1 | seq |
| .....uuuuuGcuggauguacuugcu.....     | 6    | 1 | seq |
| .....uuaaacguggauAuuacuugcu.....    | 4    | 1 | seq |
| .....uuuuuUcuggauguacuugcu.....     | 2    | 1 | seq |
| .....uuaaacguggauguacuAuggcu.....   | 2    | 1 | seq |
| .....uuuGaacguggauguacuugcu.....    | 7    | 1 | seq |
| .....Cuaaacguggauguacuugcu.....     | 28   | 1 | seq |
| .....uuaaacguggauguacuugcuC.....    | 1    | 1 | seq |
| .....Auaaacguggauguacuugcuu.....    | 8    | 1 | seq |
| .....uuaaacguggauguacuugGuu.....    | 1    | 1 | seq |
| .....uuaaacguggauguacuAuggcuu.....  | 1    | 1 | seq |
| .....uuuGaacguggauguacuugcuu.....   | 1    | 1 | seq |
| .....uuaaacguggauguacuugcuu.....    | 63   | 0 | seq |
| .....Guaaacguggauguacuugcuu.....    | 1    | 1 | seq |
| .....uuaaacguggauguacuugcuA.....    | 3    | 1 | seq |
| .....uuaaacAuggauguacuugcuu.....    | 1    | 1 | seq |
| .....uuaaacguggauguacuugUuu.....    | 1    | 1 | seq |
| .....uuaaacguggauguacuugcAu.....    | 1    | 1 | seq |
| .....uAaaacguggauguacuugcuu.....    | 2    | 1 | seq |
| .....Cuaaacguggauguacuugcuu.....    | 57   | 1 | seq |
| .....Cuaaacguggauguacuugcuuu.....   | 3    | 1 | seq |
| .....uuaaacguggauguacuugcuuu.....   | 6    | 0 | seq |
| .....uuaaacguggauguacuugcuuA.....   | 10   | 1 | seq |
| .....uuaaacguggauguacuugcuuug.....  | 2    | 0 | seq |
| .....Cuaaacguggauguacuugcuuug.....  | 1    | 1 | seq |
| .....uuaaacguggauguacuugcuuuga..... | 1    | 0 | seq |
| .....uuaaacguggUauguacuug.....      | 1    | 1 | seq |
| .....uuaaacguggauguacuugCg.....     | 2    | 1 | seq |
| .....Gaaacguggauguacuug.....        | 1    | 1 | seq |
| .....uuaaacguggauguGcuug.....       | 2    | 1 | seq |
| .....uuaaacguggauguacuug.....       | 1004 | 0 | seq |
| .....uuaaacguggauguacuuC.....       | 2    | 1 | seq |
| .....uuaaacguggauguacuugG.....      | 3    | 1 | seq |
| .....uuaaacguggAauguacuug.....      | 1    | 1 | seq |
| .....uuaaacguggauguacuugCug.....    | 1    | 1 | seq |
| .....uuaaacguggUugacuug.....        | 1    | 1 | seq |
| .....uuaaacguggaugCacuug.....       | 3    | 1 | seq |

ccaccacuuuaacguggauguacuugcuuugaaacuaaagaaguaagugcuuccauguuuuggugaugg

|                                  |       |   |     |
|----------------------------------|-------|---|-----|
| ..... uaaacguggauAuacuug .....   | 1     | 1 | seq |
| ..... uaaacguggaCguacuug .....   | 3     | 1 | seq |
| ..... uaaacgAggauguacuug .....   | 2     | 1 | seq |
| ..... uGaacguggauguacuug .....   | 3     | 1 | seq |
| ..... uaaacgUAgauacuug .....     | 2     | 1 | seq |
| ..... uaaacgCggauguacuug .....   | 2     | 1 | seq |
| ..... Caaacguggauguacuug .....   | 1     | 1 | seq |
| ..... uaaGcuggauguacuug .....    | 1     | 1 | seq |
| ..... uaaacguggGuguacuug .....   | 1     | 1 | seq |
| ..... uUaacguggauguacuug .....   | 1     | 1 | seq |
| ..... uaaacguggauguacAug .....   | 1     | 1 | seq |
| ..... uaGacguggauguacuug .....   | 4     | 1 | seq |
| ..... uaaacguggauguacuugG .....  | 6     | 1 | seq |
| ..... uaaacgugAauguacuugc .....  | 8     | 1 | seq |
| ..... uaaacgUcgauguacuugc .....  | 6     | 1 | seq |
| ..... uaaacguggauguCuugc .....   | 2     | 1 | seq |
| ..... uaaacgAggauguacuugc .....  | 4     | 1 | seq |
| ..... uaaacguggauguacuugc .....  | 17129 | 0 | seq |
| ..... Aaaacguggauguacuugc .....  | 13    | 1 | seq |
| ..... uGaacguggauguacuugc .....  | 65    | 1 | seq |
| ..... uaaacgUAgauacuugc .....    | 21    | 1 | seq |
| ..... uaaacguggauguacuUAc .....  | 17    | 1 | seq |
| ..... uaUaacguggauguacuugc ..... | 7     | 1 | seq |
| ..... uaCacguggauguacuugc .....  | 5     | 1 | seq |
| ..... uaaacgugUauguacuugc .....  | 3     | 1 | seq |
| ..... uaaacguggaugAacuugc .....  | 4     | 1 | seq |
| ..... uCaacguggauguacuugc .....  | 3     | 1 | seq |
| ..... uaaacguggauguacuGgc .....  | 8     | 1 | seq |
| ..... uaaacguggaugGacuugc .....  | 8     | 1 | seq |
| ..... uUaacguggauguacuugc .....  | 8     | 1 | seq |
| ..... uaaacAuggauguacuugc .....  | 20    | 1 | seq |
| ..... uaaacgUggauguacuugc .....  | 1     | 1 | seq |
| ..... uaaacguggauguacuCugc ..... | 43    | 1 | seq |
| ..... uaaacguggaugCacuugc .....  | 37    | 1 | seq |
| ..... uaaacgCggauguacuugc .....  | 42    | 1 | seq |
| ..... uaaacguggauguauuugc .....  | 10    | 1 | seq |
| ..... uaaacUuggauguacuugc .....  | 1     | 1 | seq |
| ..... uaaacguggauguUcuugc .....  | 5     | 1 | seq |
| ..... uaaacguggauUuacuugc .....  | 1     | 1 | seq |
| ..... uaaacguggauguacuUc .....   | 1     | 1 | seq |
| ..... uaaacguggaAguacuugc .....  | 8     | 1 | seq |
| ..... uaaacguggauguacuugU .....  | 29    | 1 | seq |
| ..... uaaaUguggauguacuugc .....  | 15    | 1 | seq |
| ..... uaaacguggauguacuAugc ..... | 8     | 1 | seq |
| ..... uaaacguggauguacuugA .....  | 3     | 1 | seq |
| ..... uaaacguggaGguacuugc .....  | 6     | 1 | seq |
| ..... uaaacguggauguacuCgc .....  | 54    | 1 | seq |
| ..... uaaacguggaCguacuugc .....  | 55    | 1 | seq |
| ..... uaaCcguggauguacuugc .....  | 9     | 1 | seq |
| ..... uaaacguggauAuacuugc .....  | 21    | 1 | seq |
| ..... Gaaacguggauguacuugc .....  | 19    | 1 | seq |
| ..... uaaUcguggauguacuugc .....  | 3     | 1 | seq |
| ..... uaaacguggauguGcuugc .....  | 44    | 1 | seq |
| ..... uaaacgugCauguacuugc .....  | 1     | 1 | seq |
| ..... uaaaGguggauguacuugc .....  | 1     | 1 | seq |
| ..... uaaacguggauguacuUc .....   | 3     | 1 | seq |
| ..... uaGacguggauguacuugc .....  | 44    | 1 | seq |
| ..... Caaacguggauguacuugc .....  | 40    | 1 | seq |
| ..... uaaacgGggauguacuugc .....  | 3     | 1 | seq |
| ..... uaaGcguggauguacuugc .....  | 50    | 1 | seq |
| ..... uaaacguggUguacuugc .....   | 8     | 1 | seq |
| ..... uaaacguggauguacuGugc ..... | 3     | 1 | seq |
| ..... uaaacguggauguacuAgc .....  | 4     | 1 | seq |
| ..... uaaacCuggauguacuugc .....  | 1     | 1 | seq |
| ..... uaaacguggGuguacuugc .....  | 58    | 1 | seq |
| ..... uaaacguggauguacuugcG ..... | 366   | 1 | seq |
| ..... uaaUcguggauguacuugcu ..... | 14    | 1 | seq |
| ..... uaaacguggauguacuugcA ..... | 59    | 1 | seq |
| ..... uUaacguggauguacuugcu ..... | 45    | 1 | seq |

ccaccacuuuaacguggauguacuugcuuugaaacuaaagaaguaagugcuuccauguuuuggugaugg

|                                    |       |   |     |
|------------------------------------|-------|---|-----|
| ..... uaaacgugUauguacuugcu .....   | 22    | 1 | seq |
| ..... uaaacguggauguaGuugcu .....   | 4     | 1 | seq |
| ..... uaaacguggauguacCugcu .....   | 194   | 1 | seq |
| ..... uaaacguggaugCacuugcu .....   | 132   | 1 | seq |
| ..... uaaacguggUuguacuugcu .....   | 42    | 1 | seq |
| ..... uaaacguggauguacuAcu .....    | 43    | 1 | seq |
| ..... uaaacguggGuguacuugcu .....   | 288   | 1 | seq |
| ..... uaaaGuggauguacuugcu .....    | 4     | 1 | seq |
| ..... uaaacguggauguacGugcu .....   | 7     | 1 | seq |
| ..... uaaacAuggauguacuugcu .....   | 120   | 1 | seq |
| ..... uaaGcuggauguacuugcu .....    | 194   | 1 | seq |
| ..... uaUacguggauguacuugcu .....   | 24    | 1 | seq |
| ..... uaaacguggCuguacuugcu .....   | 12    | 1 | seq |
| ..... uaaacCuggauguacuugcu .....   | 3     | 1 | seq |
| ..... uaaacGggauguacuugcu .....    | 10    | 1 | seq |
| ..... uaaacguggauguacAugcu .....   | 36    | 1 | seq |
| ..... uaaacGcuggauguacuugcu .....  | 185   | 1 | seq |
| ..... uaaacGAggugauguacuugcu ..... | 12    | 1 | seq |
| ..... uaaacguCgugauguacuugcu ..... | 10    | 1 | seq |
| ..... uaaacguggauguGcuugcu .....   | 273   | 1 | seq |
| ..... uaaacguggauguacuugUu .....   | 91    | 1 | seq |
| ..... uaCacguggauguacuugcu .....   | 15    | 1 | seq |
| ..... uaaacguggauguacuugcC .....   | 427   | 1 | seq |
| ..... uaaacguggauguacuugcu .....   | 78998 | 0 | seq |
| ..... uaaacguggauguCuugcu .....    | 11    | 1 | seq |
| ..... uaaacguggauguacuAugcu .....  | 38    | 1 | seq |
| ..... uaaaAguggauguacuugcu .....   | 1     | 1 | seq |
| ..... uaaCcguggauguacuugcu .....   | 32    | 1 | seq |
| ..... uaaacguUgugauguacuugcu ..... | 25    | 1 | seq |
| ..... uaaacguggauguacuugcu .....   | 37    | 1 | seq |
| ..... uaaacguggaCguacuugcu .....   | 256   | 1 | seq |
| ..... uCaacguggauguacuugcu .....   | 13    | 1 | seq |
| ..... uaaacguggauguacuugAu .....   | 42    | 1 | seq |
| ..... uaaacguggauUuacuugcu .....   | 3     | 1 | seq |
| ..... uaaacguggaGguacuugcu .....   | 14    | 1 | seq |
| ..... Gaaacguggauguacuugcu .....   | 81    | 1 | seq |
| ..... uaaacguggauguacuCgcu .....   | 230   | 1 | seq |
| ..... uaaacgugCaugacuugcu .....    | 4     | 1 | seq |
| ..... Aaaacguggauguacuugcu .....   | 63    | 1 | seq |
| ..... uaaacUuggauguacuugcu .....   | 8     | 1 | seq |
| ..... uGaacguggauguacuugcu .....   | 301   | 1 | seq |
| ..... uaaacguggauAuacuugcu .....   | 72    | 1 | seq |
| ..... uaaacguggauCuacuugcu .....   | 4     | 1 | seq |
| ..... uaaacguggaAgacuugcu .....    | 28    | 1 | seq |
| ..... uaaacguggauguacuCu .....     | 4     | 1 | seq |
| ..... uaaacguggaugAacuugcu .....   | 20    | 1 | seq |
| ..... uaaaUguggauguacuugcu .....   | 77    | 1 | seq |
| ..... uaaacguggauguacuugGu .....   | 8     | 1 | seq |
| ..... uaaacguggauguaUuugcu .....   | 63    | 1 | seq |
| ..... uaaacguggauguacuAugcu .....  | 4     | 1 | seq |
| ..... uaaacguAgaugacuugcu .....    | 79    | 1 | seq |
| ..... uaaacguggauguacuGgcu .....   | 30    | 1 | seq |
| ..... uaaacgugAauguacuugcu .....   | 41    | 1 | seq |
| ..... Caaacguggauguacuugcu .....   | 173   | 1 | seq |
| ..... uaGacguggauguacuugcu .....   | 217   | 1 | seq |
| ..... uaaacguggauguacuUcu .....    | 4     | 1 | seq |
| ..... uaaacguggaugGacuugcu .....   | 39    | 1 | seq |
| ..... uaaacguggauguacGugcuu .....  | 31    | 1 | seq |
| ..... uaaacgugAauguacuugcuu .....  | 169   | 1 | seq |
| ..... uaaacguggauguacuugcGu .....  | 242   | 1 | seq |
| ..... uCaacguggauguacuugcuu .....  | 44    | 1 | seq |
| ..... uaaacguggauguacuugcuA .....  | 203   | 1 | seq |
| ..... Aaaacguggauguacuugcuu .....  | 157   | 1 | seq |
| ..... uaaacguggaAgacuugcuu .....   | 83    | 1 | seq |
| ..... uaaacguggauAuacuugcuu .....  | 228   | 1 | seq |
| ..... uGaacguggauguacuugcuu .....  | 939   | 1 | seq |
| ..... uaaacguggauguacuugUuu .....  | 326   | 1 | seq |
| ..... uUaacguggauguacuugcuu .....  | 121   | 1 | seq |
| ..... uaaacgugUauguacuugcuu .....  | 68    | 1 | seq |



ccaccacuuuaacguggauguacuugcuuugaaacuaaagaaguaagugcuuccauguuuuggugaugg

|                                    |        |   |     |
|------------------------------------|--------|---|-----|
| ..... uaaaAguggauguacuugcuu.....   | 7      | 1 | seq |
| ..... uaaacguggGuguaCuugcuu.....   | 1021   | 1 | seq |
| ..... uaaacguggauguacuugcCu.....   | 624    | 1 | seq |
| ..... uaaacguggauguacuugcAu.....   | 150    | 1 | seq |
| ..... uaaacguggauCuacuugcuu.....   | 10     | 1 | seq |
| ..... uaaacguggauguCuugcuu.....    | 32     | 1 | seq |
| ..... uaaacguggauguAGuugcuu.....   | 2      | 1 | seq |
| ..... uaaacguAGauguacuugcuu.....   | 227    | 1 | seq |
| ..... Caaacguggauguacuugcuu.....   | 591    | 1 | seq |
| ..... uaaacguggauguacuugAuu.....   | 29     | 1 | seq |
| ..... uaaacguggauUuacuugcuu.....   | 19     | 1 | seq |
| ..... uaaacguggauguacuCu.....      | 15     | 1 | seq |
| ..... uaaacguggauguAUuugcuu.....   | 189    | 1 | seq |
| ..... uaaacguggauguacuGgcuu.....   | 91     | 1 | seq |
| ..... uaaacguggauguacuAcuu.....    | 186    | 1 | seq |
| ..... uaaacguggauguacuCgcuu.....   | 678    | 1 | seq |
| ..... uaGacguggauguacuugcuu.....   | 744    | 1 | seq |
| ..... uaaacgGggaugacuugcuu.....    | 35     | 1 | seq |
| ..... uaaacguggauguacuUcuu.....    | 19     | 1 | seq |
| ..... uaaacguggauguacuCugcuu.....  | 684    | 1 | seq |
| ..... uaaacguggauguacuAgcuu.....   | 114    | 1 | seq |
| ..... uaaacguggauguUcuugcuu.....   | 103    | 1 | seq |
| ..... uaaacguggauguacuugcuC.....   | 848    | 1 | seq |
| ..... uaaacguggaugCacuugcuu.....   | 465    | 1 | seq |
| ..... uaaaGguggauguacuugcuu.....   | 8      | 1 | seq |
| ..... uaaacguggauguGcuugcuu.....   | 804    | 1 | seq |
| ..... uaaacguggaGguacuugcuu.....   | 26     | 1 | seq |
| ..... Gaaacguggauguacuugcuu.....   | 230    | 1 | seq |
| ..... uaaacgCggaugacuugcuu.....    | 541    | 1 | seq |
| ..... uaaacguUgaugacuugcuu.....    | 69     | 1 | seq |
| ..... uaaacUuggauguacuugcuu.....   | 17     | 1 | seq |
| ..... uaaGcuggauguacuugcuu.....    | 705    | 1 | seq |
| ..... uaaacguggCugacuugcuu.....    | 28     | 1 | seq |
| ..... uaaUcguggauguacuugcuu.....   | 42     | 1 | seq |
| ..... uaaacguggaCguacuugcuu.....   | 854    | 1 | seq |
| ..... uaaacguggauguacuugcuG.....   | 783    | 1 | seq |
| ..... uaaacguggauguAAuugcuu.....   | 15     | 1 | seq |
| ..... uaaaUguggauguacuugcuu.....   | 245    | 1 | seq |
| ..... uaaacguggaugGacuugcuu.....   | 98     | 1 | seq |
| ..... uaaacgugCaugacuugcuu.....    | 19     | 1 | seq |
| ..... uaaacAuggaugacuugcuu.....    | 376    | 1 | seq |
| ..... uaaacguggauguacuugcuu.....   | 259397 | 0 | seq |
| ..... uaaacguggauguacuAugcuu.....  | 113    | 1 | seq |
| ..... uaaacguCgaugacuugcuu.....    | 27     | 1 | seq |
| ..... uaCacguggauguacuugcuu.....   | 40     | 1 | seq |
| ..... uaaacCuggauguacuugcuu.....   | 12     | 1 | seq |
| ..... uaaCcguggauguacuugcuu.....   | 141    | 1 | seq |
| ..... uaUacguggauguacuugcuu.....   | 79     | 1 | seq |
| ..... uaaacguggauguacuugGuu.....   | 14     | 1 | seq |
| ..... uaaacguggUugacuugcuu.....    | 109    | 1 | seq |
| ..... uaaacgAggaugacuugcuu.....    | 51     | 1 | seq |
| ..... uaaacguggaugAacuugcuu.....   | 62     | 1 | seq |
| ..... uaaacgugAauguacuugcuuu.....  | 12     | 1 | seq |
| ..... uaaacguggauguacuugcuuG.....  | 53     | 1 | seq |
| ..... uaaacguggauguacuugcCu.....   | 28     | 1 | seq |
| ..... uaaacguAGauguacuugcuuu.....  | 9      | 1 | seq |
| ..... uaGacguggauguacuugcuuu.....  | 22     | 1 | seq |
| ..... uaaacguggauguAUuugcuuu.....  | 6      | 1 | seq |
| ..... uaaacguggauguacuGugcuuu..... | 1      | 1 | seq |
| ..... uaaacguggauguacuCgcuuu.....  | 31     | 1 | seq |
| ..... uaaacguggauguacuugcGu.....   | 4      | 1 | seq |
| ..... uaaacguggaugGacuugcuuu.....  | 5      | 1 | seq |
| ..... uaaacguggUugacuugcuuu.....   | 2      | 1 | seq |
| ..... uaaacguggauguCuugcuuu.....   | 2      | 1 | seq |
| ..... uaaacguggaCguacuugcuuu.....  | 30     | 1 | seq |
| ..... uaaacgugUauguacuugcuuu.....  | 3      | 1 | seq |
| ..... uaaacguggauguacuGgcuuu.....  | 1      | 1 | seq |
| ..... uaaacgGggaugacuugcuuu.....   | 1      | 1 | seq |
| ..... uaaCcguggauguacuugcuuu.....  | 1      | 1 | seq |

ccaccacuuuaacguggauguacuugcuuugaaacuaaagaaguaagugcuuccauguuuuggugaugg

|                                      |      |   |     |
|--------------------------------------|------|---|-----|
| ..... uaaacguggauguaAaugcuuu .....   | 1    | 1 | seq |
| ..... uaaacguggauguacuugcuuA .....   | 204  | 1 | seq |
| ..... uGaacguggauguacuugcuuu .....   | 34   | 1 | seq |
| ..... Caaacguggauguacuugcuuu .....   | 21   | 1 | seq |
| ..... uaaacguggCuguaacuugcuuu .....  | 2    | 1 | seq |
| ..... uaaacguggauguacuugAuuu .....   | 1    | 1 | seq |
| ..... uaUacguggauguacuugcuuu .....   | 4    | 1 | seq |
| ..... uaaacguggauguacAugcuuu .....   | 5    | 1 | seq |
| ..... uaaacguggauguacCugcuuu .....   | 24   | 1 | seq |
| ..... uCaacguggauguacuugcuuu .....   | 3    | 1 | seq |
| ..... uaCacguggauguacuugcuuu .....   | 2    | 1 | seq |
| ..... uaaacguggauguacuugcAuu .....   | 3    | 1 | seq |
| ..... uaaacguggauguacuugUuuu .....   | 11   | 1 | seq |
| ..... uaaacguggaAguacuugcuuu .....   | 4    | 1 | seq |
| ..... uaaaUguggauguacuugcuuu .....   | 8    | 1 | seq |
| ..... uaaacguggaugCacuugcuuu .....   | 21   | 1 | seq |
| ..... uaaacguggauguacuAuuu .....     | 8    | 1 | seq |
| ..... uaaGcuggauguacuugcuuu .....    | 20   | 1 | seq |
| ..... uaaacguggauguacuugcuGu .....   | 11   | 1 | seq |
| ..... uaaacguggauAuuacuugcuuu .....  | 8    | 1 | seq |
| ..... Gaaacguggauguacuugcuuu .....   | 11   | 1 | seq |
| ..... uaaacguCgaugacuugcuuu .....    | 1    | 1 | seq |
| ..... uaaacUuggauguacuugcuuu .....   | 2    | 1 | seq |
| ..... uaaacguggauguacuugcuAu .....   | 5    | 1 | seq |
| ..... uaaacguggauguacuUcuuu .....    | 1    | 1 | seq |
| ..... uaaacguggauguUcuugcuuu .....   | 2    | 1 | seq |
| ..... uaaacguggauguacuUcuuu .....    | 1    | 1 | seq |
| ..... uaaacguggGuguacuugcuuu .....   | 30   | 1 | seq |
| ..... uaaacAuggaugacuugcuuu .....    | 18   | 1 | seq |
| ..... uUaacguggauguacuugcuuu .....   | 4    | 1 | seq |
| ..... uaaacguggauguacuugcuCu .....   | 9    | 1 | seq |
| ..... uaaacguggauguacuugcuuu .....   | 9532 | 0 | seq |
| ..... uaaacguggauguacuAguuuu .....   | 4    | 1 | seq |
| ..... uaaacguUgaugacuugcuuu .....    | 5    | 1 | seq |
| ..... uaaacguggauguGcuugcuuu .....   | 34   | 1 | seq |
| ..... Aaaacguggauguacuugcuuu .....   | 5    | 1 | seq |
| ..... uaaacguggaugAacuugcuuu .....   | 3    | 1 | seq |
| ..... uaaacguggauguacuugcuuC .....   | 98   | 1 | seq |
| ..... uaaacgCggaugacuugcuuu .....    | 23   | 1 | seq |
| ..... uaaacgAggaugacuugcuuu .....    | 7    | 1 | seq |
| ..... uaaacguggauguacuugcuCug .....  | 3    | 1 | seq |
| ..... uaaacguggauguacuugcuug .....   | 13   | 1 | seq |
| ..... uaaacguggauguacuugcuuug .....  | 8    | 1 | seq |
| ..... uGaacguggauguacuugcuuug .....  | 14   | 1 | seq |
| ..... uaaacguggauguacuAuuug .....    | 4    | 1 | seq |
| ..... uaaacguggauAuuacuugcuuug ..... | 2    | 1 | seq |
| ..... uaaacgCggaugacuugcuuug .....   | 6    | 1 | seq |
| ..... Aaaacguggauguacuugcuuug .....  | 2    | 1 | seq |
| ..... uaaacguggaugCacuugcuuug .....  | 2    | 1 | seq |
| ..... uaaacgAggaugacuugcuuug .....   | 3    | 1 | seq |
| ..... uaaacguggauguacuugcuGuug ..... | 3    | 1 | seq |
| ..... uaaacguUgaugacuugcuuug .....   | 2    | 1 | seq |
| ..... uaaacguggauguacuugcuuUC .....  | 29   | 1 | seq |
| ..... uaaGcuggauguacuugcuuug .....   | 9    | 1 | seq |
| ..... uaUacguggauguacuugcuuug .....  | 1    | 1 | seq |
| ..... uaaacguggauguGcuugcuuug .....  | 8    | 1 | seq |
| ..... uaaacguggauguacAugcuuug .....  | 2    | 1 | seq |
| ..... uaaacguAgaugacuugcuuug .....   | 4    | 1 | seq |
| ..... uaaUcuggauguacuugcuuug .....   | 2    | 1 | seq |
| ..... uaaacguggauguacuugcuuug .....  | 2    | 1 | seq |
| ..... uaaacguggauguacuugcuuAg .....  | 7    | 1 | seq |
| ..... uaaaAguggauguacuugcuuug .....  | 1    | 1 | seq |
| ..... uaaacguggauguacuugcuuU .....   | 18   | 1 | seq |
| ..... uaaacguggGuguacuugcuuug .....  | 14   | 1 | seq |
| ..... uaaacgugAauguacuugcuuug .....  | 3    | 1 | seq |
| ..... uaaacguggauguacuugAuuug .....  | 1    | 1 | seq |
| ..... uaaacguggauguacuugcuuCG .....  | 13   | 1 | seq |
| ..... uaaacguggauguUcuugcuuug .....  | 3    | 1 | seq |
| ..... uaGacguggauguacuugcuuug .....  | 7    | 1 | seq |

ccaccacuuuaacguggauguacuugcuuugaaacuaaagaaguaagugcuuccauguuuuggugaugg

|                                            |      |   |     |
|--------------------------------------------|------|---|-----|
| ..... uaaacguggauguacuugcuuug.....         | 8    | 1 | seq |
| ..... uaaacguggauguacuugUuuug.....         | 1    | 1 | seq |
| ..... uaaacguggauguacuugcuuGg.....         | 5    | 1 | seq |
| ..... uaaacguggauguacuUuuuug.....          | 1    | 1 | seq |
| ..... uaaacguggauguaUuuugcuuug.....        | 5    | 1 | seq |
| ..... uaaacgugUauguacuugcuuug.....         | 2    | 1 | seq |
| ..... uaaacguggaugGacuugcuuug.....         | 1    | 1 | seq |
| ..... uUaacguggauguacuugcuuug.....         | 2    | 1 | seq |
| ..... uaaacguggauguacuugcuuuA.....         | 188  | 1 | seq |
| ..... uaaacguggaAguacuugcuuug.....         | 1    | 1 | seq |
| ..... uaaacguggauguacuugcuGug.....         | 1    | 1 | seq |
| ..... Caaacguggauguacuugcuuug.....         | 7    | 1 | seq |
| ..... uaaacguggauguacuAgcuuug.....         | 2    | 1 | seq |
| ..... uaaacguggauguacuugcuAug.....         | 2    | 1 | seq |
| ..... uaaacguggauguacuugcuAuuug.....       | 4    | 1 | seq |
| ..... uaaacguggaCguacuugcuuug.....         | 8    | 1 | seq |
| ..... uaaacguggauguacuugcuuug.....         | 3256 | 0 | seq |
| ..... Gaaacguggauguacuugcuuug.....         | 6    | 1 | seq |
| ..... uaaCcguggauguacuugcuuug.....         | 5    | 1 | seq |
| ..... uaaaUguggauguacuugcuuug.....         | 5    | 1 | seq |
| ..... uaaacAuggugauguacuugcuuug.....       | 4    | 1 | seq |
| ..... uaaacguggauguacuugcuuuUa.....        | 2    | 1 | seq |
| ..... uaaacgCggaugauguacuugcuuuga.....     | 2    | 1 | seq |
| ..... uaaacguggauguacuugcuuugC.....        | 3    | 1 | seq |
| ..... uaaacguggauguacuugcuuuAa.....        | 24   | 1 | seq |
| ..... uaaacguggauguacuugcuuugU.....        | 5    | 1 | seq |
| ..... uaaacguggauguacuugcuuuga.....        | 201  | 0 | seq |
| ..... uaaGcguggauguacuugcuuuga.....        | 1    | 1 | seq |
| ..... uaaacguggauguGcuugcuuuga.....        | 1    | 1 | seq |
| ..... uaaacguggauguacuugcuCuga.....        | 2    | 1 | seq |
| ..... uaaacguggauguacuugcuuuuG.....        | 4    | 1 | seq |
| ..... uaaacgugCauguacuugcuuuga.....        | 1    | 1 | seq |
| ..... uaaacguggauguacuugcuGuuga.....       | 1    | 1 | seq |
| ..... uaGacguggauguacuugcuuuugaa.....      | 3    | 1 | seq |
| ..... Caaacguggauguacuugcuuuugaa.....      | 1    | 1 | seq |
| ..... uaaacguggauguacuugcuuuAaa.....       | 1    | 1 | seq |
| ..... uaaacguggauguacuugcuuuugaG.....      | 4    | 1 | seq |
| ..... uaaacguggauguacuugcuuuugaC.....      | 1    | 1 | seq |
| ..... uaaacguggauguacuugcuuuugCa.....      | 1    | 1 | seq |
| ..... uaaacguggauguacuugcuuuugaa.....      | 85   | 0 | seq |
| ..... uaaacguggauguacuugcuuuugGa.....      | 1    | 1 | seq |
| ..... uaaacguggauguacuugcuuuugaa.....      | 1    | 1 | seq |
| ..... uaaacguggauguacuugcuuuugaaa.....     | 532  | 0 | seq |
| ..... uaaGcguggauguacuugcuuuugaaa.....     | 1    | 1 | seq |
| ..... uaaacguggGuguacuugcuuuugaaa.....     | 2    | 1 | seq |
| ..... uaaacguggauguacuugcuuuugaa.....      | 1    | 1 | seq |
| ..... uaaacguggauguacuugcuuuugaaa.....     | 1    | 1 | seq |
| ..... Caaacguggauguacuugcuuuugaaa.....     | 1    | 1 | seq |
| ..... uaaacguggaCguacuugcuuuugaaa.....     | 5    | 1 | seq |
| ..... uGaacguggauguacuugcuuuugaaa.....     | 5    | 1 | seq |
| ..... uaaacguggauguacuugcuuuugaaa.....     | 1    | 1 | seq |
| ..... uaaacguggauguacuugcuuuugaGa.....     | 4    | 1 | seq |
| ..... uaaacguggauguacuugcuuuugaAC.....     | 1    | 1 | seq |
| ..... uaaacAuggugauguacuugcuuuugaaa.....   | 1    | 1 | seq |
| ..... uaaacguggauguacuugcuuuugaAG.....     | 2    | 1 | seq |
| ..... uaaacguggauguacuugcuuuuAaaa.....     | 4    | 1 | seq |
| ..... uaaacguggauguacuugcuuCGaaa.....      | 2    | 1 | seq |
| ..... uaaacguggauguacuCGcuuuugaaa.....     | 1    | 1 | seq |
| ..... uaaacguggaAguacuugcuuuugaaa.....     | 1    | 1 | seq |
| ..... uaaacguggauguacuugcuCugaaa.....      | 1    | 1 | seq |
| ..... uaaacguggauguacuugcuuuugGaa.....     | 4    | 1 | seq |
| ..... uaaacgCggaugauguacuugcuuuugaaac..... | 7    | 1 | seq |
| ..... uaaacguggauguGcuugcuuuugaaac.....    | 5    | 1 | seq |
| ..... uaaacguggauguUcuugcuuuugaaac.....    | 1    | 1 | seq |
| ..... uaaacguggauguacuugcuuuugaaac.....    | 8    | 1 | seq |
| ..... uaaacguggauguacuGgcuuuugaaac.....    | 1    | 1 | seq |
| ..... uaGacguggauguacuugcuuuugaaac.....    | 8    | 1 | seq |
| ..... uaaacguggauguacuugcuuuugaaac.....    | 1    | 1 | seq |
| ..... uaaacgugCauguacuugcuuuugaaac.....    | 1    | 1 | seq |

ccaccacuuuaacguggauguacuugcuuugaaacuaaagaaguaagugcuuccauguuuuggugaugg

|                                           |      |   |     |
|-------------------------------------------|------|---|-----|
| ..... uaaacgugAauguacuugcuuugaaac.....    | 1    | 1 | seq |
| ..... uaaacguggaCguacuugcuuugaaac.....    | 10   | 1 | seq |
| ..... uaaacguggUuguacuugcuuugaaac.....    | 4    | 1 | seq |
| ..... uaUacguggauguacuugcuuugaaac.....    | 1    | 1 | seq |
| ..... uaaacgugUauguacuugcuuugaaac.....    | 3    | 1 | seq |
| ..... uaaacguggauguacuugcuuuaaac.....     | 6    | 1 | seq |
| ..... uaaacguggauguacuugcuCugaaac.....    | 5    | 1 | seq |
| ..... uaaacguggauguacuugUuuugaaac.....    | 3    | 1 | seq |
| ..... uaaacguggauguacuugcuuugaGac.....    | 8    | 1 | seq |
| ..... uaaacguggauguacuugcuuugaAUc.....    | 1    | 1 | seq |
| ..... Aaaacguggauguacuugcuuugaaac.....    | 1    | 1 | seq |
| ..... uaaacguggauguacuugcuuugaCac.....    | 1    | 1 | seq |
| ..... uaaacguggauguaUuugcuuugaaac.....    | 1    | 1 | seq |
| ..... uaaacguggauguacuugcuuugaaaA.....    | 1    | 1 | seq |
| ..... uaaacguggaugAacuugcuuugaaac.....    | 1    | 1 | seq |
| ..... uaaacGggauguacuugcuuugaaac.....     | 2    | 1 | seq |
| ..... uaaacguggauguacuugcuuugaUac.....    | 1    | 1 | seq |
| ..... uaaaUguggauguacuugcuuugaaac.....    | 1    | 1 | seq |
| ..... uaaacguggauguacuugcuuugaaac.....    | 2380 | 0 | seq |
| ..... uaaacguggauguacuugcuuugGaac.....    | 9    | 1 | seq |
| ..... uaaacguggauguaAuugcuuugaaac.....    | 1    | 1 | seq |
| ..... uaaacguggauguacuugcCuugaaac.....    | 12   | 1 | seq |
| ..... Caaacguggauguacuugcuuugaaac.....    | 4    | 1 | seq |
| ..... uaaacguggauguacuugcuuugaaaU.....    | 1    | 1 | seq |
| ..... uaaacguggaugGacuugcuuugaaac.....    | 3    | 1 | seq |
| ..... uaaacguggauguacuCgcuuugaaac.....    | 3    | 1 | seq |
| ..... uaaacguCgaugacuugcuuugaaac.....     | 1    | 1 | seq |
| ..... uaaacgAggugacuugcuuugaaac.....      | 1    | 1 | seq |
| ..... uaaacguggauguacuugcuuAgaac.....     | 1    | 1 | seq |
| ..... uaaacguAgaugacuugcuuugaaac.....     | 2    | 1 | seq |
| ..... uaaacguggauguacuugcuGugaaac.....    | 3    | 1 | seq |
| ..... uaaGcguggauguacuugcuuugaaac.....    | 5    | 1 | seq |
| ..... uaaacguggaugCacuugcuuugaaac.....    | 8    | 1 | seq |
| ..... uaaacguggauguaGuugcuuugaaac.....    | 1    | 1 | seq |
| ..... uaaacguggauguacuugcuuugaAGc.....    | 15   | 1 | seq |
| ..... uaaacguggauguacuugcuuCGaac.....     | 5    | 1 | seq |
| ..... uaaacAuggauguacuugcuuugaaac.....    | 3    | 1 | seq |
| ..... uGaacguggauguacuugcuuugaaac.....    | 6    | 1 | seq |
| ..... uaaacguggauguacuugcuAuugaaac.....   | 2    | 1 | seq |
| ..... uaaacguggGugacuugcuuugaaac.....     | 8    | 1 | seq |
| ..... uaaacguggauguacuugcuuugaaac.....    | 1    | 1 | seq |
| ..... uGaacguggauguacuugcuuugaaacu.....   | 1    | 1 | seq |
| ..... uaaacguggauguGcuugcuuugaaacu.....   | 1    | 1 | seq |
| ..... uaaacguggCugacuugcuuugaaacu.....    | 1    | 1 | seq |
| ..... uaaacguggauguacuugcuuugaaacu.....   | 1    | 1 | seq |
| ..... uaaacguggauguacuugcuuugaaacu.....   | 2    | 1 | seq |
| ..... uaaacguggauguacuugcuuugaaacu.....   | 166  | 0 | seq |
| ..... uaaacguggauguacuugcuCugaaacu.....   | 1    | 1 | seq |
| ..... uaaacguggauguacuugcuuugaGacu.....   | 2    | 1 | seq |
| ..... uaaacguggauguaUuugcuuugaaacu.....   | 1    | 1 | seq |
| ..... uaaacguggauguacuugcuuugaaacG.....   | 5    | 1 | seq |
| ..... uaaacgCggauguacuugcuuugaaacu.....   | 1    | 1 | seq |
| ..... uaaacguggauguacuugcuuugaAGcu.....   | 1    | 1 | seq |
| ..... uaaCcguggauguacuugcuuugaaacu.....   | 1    | 1 | seq |
| ..... uaaacgAggugacuugcuuugaaacua.....    | 1    | 1 | seq |
| ..... uaaacguggauguacuugcuuugGaacua.....  | 1    | 1 | seq |
| ..... uaaacguggauguacuugcuuCGaacua.....   | 1    | 1 | seq |
| ..... uaaacguggGugacuugcuuugaaacua.....   | 1    | 1 | seq |
| ..... uaaacguggauguacuugcuuugaaacua.....  | 124  | 0 | seq |
| ..... uaGacguggauguacuugcuuugaaacuaa..... | 2    | 1 | seq |
| ..... uaaacguggauguacuugcuuugaaacuaU..... | 3    | 1 | seq |
| ..... uaaacguggauguacuugcuuugaaacuaC..... | 1    | 1 | seq |
| ..... uaaacguggauAacuugcuuugaaacuaa.....  | 1    | 1 | seq |
| ..... uaaacguggauguacuugcuuugaaacuaa..... | 1    | 1 | seq |
| ..... uaaGcguggauguacuugcuuugaaacuaa..... | 1    | 1 | seq |
| ..... uaaacguggauguacuugcuuugaaacuaa..... | 1    | 1 | seq |
| ..... uaaacguggauguacuugcuuugaaacuaa..... | 90   | 0 | seq |

ccaccacuuaaacguggauguacuugcuuugaaacuaaagaaguaagucuccauguuuggugaugg

|                                              |     |   |     |
|----------------------------------------------|-----|---|-----|
| ..... uaaacguggaAguacuugcuuugaaacuaaa.....   | 1   | 1 | seq |
| ..... uaaacguggauguacuugcuuugaaacuaaG.....   | 1   | 1 | seq |
| ..... uaaacguggauguacuugcuuugaaacuaGa.....   | 1   | 1 | seq |
| ..... uaaacguggauguacuCgcuuugaaacuaaa.....   | 1   | 1 | seq |
| ..... uaaacguggauguacuugcuuugaaacCaaa.....   | 1   | 1 | seq |
| ..... uaaacguggauguacuugcuCugaaacuaaa.....   | 1   | 1 | seq |
| ..... uaaacguggauguacuugcuuugGaaacuaaa.....  | 1   | 1 | seq |
| ..... uaaacguggauguacuugcuuugaaacuaaU.....   | 1   | 1 | seq |
| ..... uaaacgugUauguacuugcuuugaaacuaaa.....   | 1   | 1 | seq |
| ..... uaaacguggauguacuugcuuugaaacuaaa.....   | 51  | 0 | seq |
| ..... uaaacguggauguacuugcuuugaaacuaaGg.....  | 3   | 1 | seq |
| ..... Gaaacguggauguacuugcuuugaaacuaaag.....  | 2   | 1 | seq |
| ..... uaaacguggaugGacuugcuuugaaacuaaag.....  | 1   | 1 | seq |
| ..... uaaacguggauguacuugcuuugaaacuaaag.....  | 555 | 0 | seq |
| ..... uaaacguggauguacAugcuuugaaacuaaag.....  | 1   | 1 | seq |
| ..... uaaacguggauguaUuugcuuugaaacuaaag.....  | 1   | 1 | seq |
| ..... uaaacguggauguacuugcuuugaaacuaaaC.....  | 1   | 1 | seq |
| ..... uaaacguggauguacuugcuuugaaacuaaag.....  | 1   | 1 | seq |
| ..... uaaacguggauguacuugcuuugaaacuaaag.....  | 2   | 1 | seq |
| ..... uaaacguggauguacuugcuuugGaaacuaaag..... | 2   | 1 | seq |
| ..... uaaacguggauguacuugcuuugUaaacuaaag..... | 1   | 1 | seq |
| ..... uaaacguggauguacuugcuuugaaacuGaaag..... | 2   | 1 | seq |
| ..... Caaacguggauguacuugcuuugaaacuaaag.....  | 4   | 1 | seq |
| ..... uaaacguggauguacuugcuuugaaacuaGag.....  | 3   | 1 | seq |
| ..... uaGacguggauguacuugcuuugaaacuaaag.....  | 4   | 1 | seq |
| ..... uaaacguggauguacuugcuuugaaUcuaaag.....  | 1   | 1 | seq |
| ..... uaaacguggauguUcuugcuuugaaacuaaag.....  | 1   | 1 | seq |
| ..... uaaGcguggauguacuugcuuugaaacuaaag.....  | 1   | 1 | seq |
| ..... uaaacguggauguacuugcuAugaaacuaaag.....  | 1   | 1 | seq |
| ..... uaaacguggaCguacuugcuuugaaacuaaag.....  | 3   | 1 | seq |
| ..... uaaacguggauguacuCgcuuugaaacuaaag.....  | 1   | 1 | seq |
| ..... uaaacgugUauguacuugcuuugaaacuaaag.....  | 1   | 1 | seq |
| ..... uaaacguggauguacuugcuuugaGacuaaag.....  | 3   | 1 | seq |
| ..... uaaacguggauguacuugcuGugaaacuaaag.....  | 1   | 1 | seq |
| ..... uaaacguggGuguacuugcuuugaaacuaaag.....  | 4   | 1 | seq |
| ..... uGaacguggauguacuugcuuugaaacuaaag.....  | 3   | 1 | seq |
| ..... uaaacgCggaugacuugcuuugaaacuaaag.....   | 2   | 1 | seq |
| ..... uaaacguggauguacuugcuuugaaacuaaaga..... | 5   | 0 | seq |
| ..... uaaacguggauguacuugcuuugaaacuaaagU..... | 1   | 1 | seq |
| ..... Uaacguggauguacuugc.....                | 2   | 1 | seq |
| ..... aaacguggauguacuugc.....                | 10  | 0 | seq |
| ..... aaacguggauguacuugcu.....               | 38  | 0 | seq |
| ..... aaGcguggauguacuugcu.....               | 1   | 1 | seq |
| ..... Gaacguggauguacuugcu.....               | 1   | 1 | seq |
| ..... Uaacguggauguacuugcu.....               | 32  | 1 | seq |
| ..... aaacguggGuguacuugcu.....               | 1   | 1 | seq |
| ..... Uaacguggauguacuugcuu.....              | 69  | 1 | seq |
| ..... aGacguggauguacuugcuu.....              | 1   | 1 | seq |
| ..... aaacguggauguacuugcuu.....              | 66  | 0 | seq |
| ..... Uaacguggauguacuugcuuu.....             | 5   | 1 | seq |
| ..... aaacguggauguacuugcuuu.....             | 2   | 0 | seq |
| ..... Uaacguggauguacuugcuuug.....            | 1   | 1 | seq |
| ..... aaacguggauguacuugcuuug.....            | 2   | 0 | seq |
| ..... Uaacguggauguacuugcuuugaaa.....         | 1   | 1 | seq |
| ..... Uaacguggauguacuugcuuugaaac.....        | 1   | 1 | seq |
| ..... aacguggauguacuugcu.....                | 6   | 0 | seq |
| ..... aacguggauguacuugcuu.....               | 17  | 0 | seq |
| ..... aacguggauguacuugcuuu.....              | 2   | 0 | seq |
| ..... aacguggauguacuugcuuug.....             | 2   | 0 | seq |
| ..... Ccguggauguacuugcuu.....                | 2   | 1 | seq |
| ..... acguggauguGcuugcuu.....                | 1   | 1 | seq |
| ..... acguggauguacuugcCu.....                | 1   | 1 | seq |
| ..... acguggauguacuAgcuu.....                | 1   | 1 | seq |
| ..... acgGggaugacuugcuu.....                 | 1   | 1 | seq |
| ..... acguggauguacuugcuu.....                | 32  | 0 | seq |
| ..... cguggauguacuugcuuu.....                | 6   | 0 | seq |
| ..... cguggauguacuugcuuug.....               | 2   | 0 | seq |
| ..... cguggauguacuugcuuuga.....              | 1   | 0 | seq |
| ..... cguggauguacuugcuuGgaaac.....           | 1   | 1 | seq |

ccaccacuuaaacguggauguacuugcuuugaaacuaaagaaguaagugcuuccauguuuuggugaugg

|                                       |     |   |     |
|---------------------------------------|-----|---|-----|
| .....cguggauguacuugcuuugaaac.....     | 3   | 0 | seq |
| .....guggauguacuugcuuug.....          | 5   | 0 | seq |
| .....guggauguacuugcuuuga.....         | 1   | 0 | seq |
| .....guggauguacuugcuuugaaa.....       | 3   | 0 | seq |
| .....guggauguacuugcuuugGaa.....       | 1   | 1 | seq |
| .....guggauguacuugcuuugaaac.....      | 3   | 0 | seq |
| .....guggauguacuugcuuugaaacua.....    | 1   | 0 | seq |
| .....guggauguacuugcuuugaaacuaaag..... | 2   | 0 | seq |
| .....uggauguacuugcuuugaaac.....       | 2   | 0 | seq |
| .....uggauguacuugcCuugaaac.....       | 1   | 1 | seq |
| .....uggauguacuugcuuugaaacuaaaga..... | 1   | 0 | seq |
| .....ggaugacuugcuuugaaa.....          | 1   | 0 | seq |
| .....gaugacuugcuuugaaa.....           | 1   | 0 | seq |
| .....gaugacuugcuuugaaacuaaaga.....    | 1   | 0 | seq |
| .....guacuugcuuugaaacuaa.....         | 1   | 0 | seq |
| .....ugcuuugaaacuaaagaa.....          | 1   | 0 | seq |
| .....aguaagugcuuccauguu.....          | 1   | 0 | seq |
| .....aguaagugcuuccauguuu.....         | 9   | 0 | seq |
| .....aguaagugcuuccauguuG.....         | 0   | 1 | seq |
| .....aguGagugcuuccauguu.....          | 0   | 1 | seq |
| .....aguaagugcuuccauguuu.....         | 15  | 0 | seq |
| .....Uguaagugcuuccauguuu.....         | 0   | 1 | seq |
| .....aAuaagugcuuccauguuu.....         | 0   | 1 | seq |
| .....aguaagAgcuuccauguuuug.....       | 1   | 1 | seq |
| .....aUuaagugcuuccauguuuug.....       | 1   | 1 | seq |
| .....aguaagugcuuccaugGuuug.....       | 2   | 1 | seq |
| .....aguaagugcuucGauguuuug.....       | 1   | 1 | seq |
| .....Gguaagugcuuccauguuuug.....       | 2   | 1 | seq |
| .....aguaagugcCuuccauguuuug.....      | 1   | 1 | seq |
| .....aguaagugcuuccauguuuGg.....       | 2   | 1 | seq |
| .....aguaagugcuuAcauguuuug.....       | 1   | 1 | seq |
| .....aguaagugUuuccauguuuug.....       | 1   | 1 | seq |
| .....aguaGgugcuuccauguuuug.....       | 1   | 1 | seq |
| .....aguaagugcAuccauguuuug.....       | 1   | 1 | seq |
| .....Uguaagugcuuccauguuuug.....       | 2   | 1 | seq |
| .....aguaagugcuuccGuguuuug.....       | 1   | 1 | seq |
| .....aguaagugcuuccauguuuug.....       | 297 | 0 | seq |
| .....aguaagugcuuccauguuuugA.....      | 1   | 1 | seq |
| .....aguaagCgcuuccauguuuugg.....      | 1   | 1 | seq |
| .....aguaagugcuuccauguuuugg.....      | 32  | 0 | seq |
| .....aguaagugcuuccauguuuuggA.....     | 2   | 1 | seq |
| .....aAuaagugcuuccauguuuuggu.....     | 1   | 1 | seq |
| .....aAuaagugcuuccauguuuuggug.....    | 8   | 1 | seq |
| .....aAuaagugcuuccauguuuugguga.....   | 1   | 1 | seq |
| .....guaagugcuuccauguuC.....          | 0   | 1 | seq |
| .....Cuaagugcuuccauguuu.....          | 0   | 1 | seq |
| .....guaagugcuuccauguuuug.....        | 3   | 0 | seq |
| .....guaagugcuuccauguuuugg.....       | 14  | 0 | seq |
| .....Auaagugcuuccauguuuugg.....       | 1   | 1 | seq |
| .....guaagugcCuuccauguuuugg.....      | 1   | 1 | seq |
| .....Cuaagugcuuccauguuuuggu.....      | 6   | 1 | seq |
| .....Auaagugcuuccauguuuuggu.....      | 2   | 1 | seq |
| .....Uuaagugcuuccauguuuuggug.....     | 2   | 1 | seq |
| .....Cuaagugcuuccauguuuugguga.....    | 2   | 1 | seq |
| .....uaagugcuuccauAuuuu.....          | 0   | 1 | seq |
| .....uaagugcuuccauguuu.....           | 24  | 0 | seq |
| .....uaagugcuuccauguuuG.....          | 2   | 1 | seq |
| .....uaagugcuuccauguuuGg.....         | 2   | 1 | seq |
| .....uaagugcCuuccauguuuug.....        | 2   | 1 | seq |
| .....uaagugcuuccaCguuug.....          | 2   | 1 | seq |
| .....uaagugcuuUcauguuuug.....         | 1   | 1 | seq |
| .....uaagugcuuccauguuCug.....         | 2   | 1 | seq |
| .....uaagugcuuccGguuug.....           | 1   | 1 | seq |
| .....uaagugcuuccaGguuug.....          | 1   | 1 | seq |
| .....uaagugcuuccauguuuAg.....         | 267 | 1 | seq |
| .....uaagugcuuccauguuuug.....         | 186 | 0 | seq |
| .....uaagugcuCccauguuuug.....         | 1   | 1 | seq |

ccaccacuuaaacguggauguacuugcuuugaaacuaaagaaguaagugcuuccauguuuuggugaugg

|                                   |      |   |     |
|-----------------------------------|------|---|-----|
| .....uaagugcuuccauguuuuU.....     | 0    | 1 | seq |
| .....uaagugcuuccauguAuug.....     | 1    | 1 | seq |
| .....uGagugcuuccauguuuug.....     | 1    | 1 | seq |
| .....uaagugcuucUauguuuugg.....    | 3    | 1 | seq |
| .....uaagugcuuccCuguuuugg.....    | 1    | 1 | seq |
| .....uaagugcCuuccauguuuugg.....   | 7    | 1 | seq |
| .....Caagugcuuccauguuuugg.....    | 4    | 1 | seq |
| .....uaagugAuuccauguuuugg.....    | 1    | 1 | seq |
| .....uaagugcuuccauguuuAgg.....    | 2    | 1 | seq |
| .....uaagugcuuccauguuuugA.....    | 2    | 1 | seq |
| .....uaagugcuuccauguuuugg.....    | 2851 | 0 | seq |
| .....uaagugcuuccauAuuuugg.....    | 2    | 1 | seq |
| .....uaagugcuuccaugGuuuugg.....   | 4    | 1 | seq |
| .....uaaAugcuuccauguuuugg.....    | 2    | 1 | seq |
| .....uaGgugcuuccauguuuugg.....    | 11   | 1 | seq |
| .....uaUgugcuuccauguuuugg.....    | 1    | 1 | seq |
| .....uaagAgcuuccauguuuugg.....    | 2    | 1 | seq |
| .....uaaguAcuuccauguuuugg.....    | 4    | 1 | seq |
| .....uaagugcuuccGuguuuugg.....    | 5    | 1 | seq |
| .....uaagugcuuccauguGugug.....    | 1    | 1 | seq |
| .....uaagugcuuccaugCuuuugg.....   | 4    | 1 | seq |
| .....uaagugcuCccauguuuugg.....    | 13   | 1 | seq |
| .....uaagugcuuccauguuuugCg.....   | 7    | 1 | seq |
| .....uaagugUuuccauguuuugg.....    | 5    | 1 | seq |
| .....uaagugcuuccauguuuugU.....    | 3    | 1 | seq |
| .....uaagugcuAccauguuuugg.....    | 3    | 1 | seq |
| .....uaagugcAuuccauguuuugg.....   | 1    | 1 | seq |
| .....uaagugcuuccauguuuUg.....     | 81   | 1 | seq |
| .....uaagugcuuccaCguuuuugg.....   | 6    | 1 | seq |
| .....uaagugcuuUccauguuuugg.....   | 5    | 1 | seq |
| .....uaagugcuuccauguuCugg.....    | 6    | 1 | seq |
| .....Gaagugcuuccauguuuugg.....    | 3    | 1 | seq |
| .....uaagugcuuccaGguuuuugg.....   | 2    | 1 | seq |
| .....uaagugcuuccauguuuGgg.....    | 6    | 1 | seq |
| .....uaagugcuuccauguuuCG.....     | 15   | 1 | seq |
| .....uaagugcuuccauguCuugg.....    | 8    | 1 | seq |
| .....uaagugcGuuccauguuuugg.....   | 1    | 1 | seq |
| .....uaagCgcuuccauguuuugg.....    | 4    | 1 | seq |
| .....uaagugcuuccauguuuugC.....    | 6    | 1 | seq |
| .....uaagugcuuccauguAuugg.....    | 3    | 1 | seq |
| .....uaagugcuuccaAuguuuugg.....   | 3    | 1 | seq |
| .....uGagugcuuccauguuuugg.....    | 14   | 1 | seq |
| .....Gaagugcuuccauguuuuggu.....   | 1    | 1 | seq |
| .....uaagugcuuccaGguuuuuggu.....  | 2    | 1 | seq |
| .....uaagugcuCccauguuuuggu.....   | 11   | 1 | seq |
| .....uaagAgcuuccauguuuuggu.....   | 1    | 1 | seq |
| .....uaagCgcuuccauguuuuggu.....   | 11   | 1 | seq |
| .....uaagugcuucUauguuuuggu.....   | 6    | 1 | seq |
| .....uaagugcAuuccauguuuuggu.....  | 1    | 1 | seq |
| .....uaagugcuuccauguuuuggG.....   | 103  | 1 | seq |
| .....uaagugcuuAccauguuuuggu.....  | 1    | 1 | seq |
| .....uaagugcuAccauguuuuggu.....   | 7    | 1 | seq |
| .....Aaagugcuuccauguuuuggu.....   | 5    | 1 | seq |
| .....uaagugcGuuccauguuuuggu.....  | 1    | 1 | seq |
| .....uaUgugcuuccauguuuuggu.....   | 4    | 1 | seq |
| .....uaagugcuuccauguuuUgu.....    | 1    | 1 | seq |
| .....uaagugcuuccauguuCuggu.....   | 11   | 1 | seq |
| .....uaagugcuuccaugGuuuuggu.....  | 4    | 1 | seq |
| .....uaagugUuuccauguuuuggu.....   | 3    | 1 | seq |
| .....uaagugcuuccauguuuAuggu.....  | 3    | 1 | seq |
| .....uaagugcuuccaugCuuuuggu.....  | 18   | 1 | seq |
| .....uaagugcuuccauguGuuuuggu..... | 3    | 1 | seq |
| .....uaagugcuuccauguuuugCu.....   | 1    | 1 | seq |
| .....uaaguAcuuccauguuuuggu.....   | 1    | 1 | seq |
| .....uaagugcuGccauguuuuggu.....   | 4    | 1 | seq |
| .....uaagugcuuccauguuuuggC.....   | 173  | 1 | seq |
| .....uaagugcuuUccauguuuuggu.....  | 8    | 1 | seq |
| .....uaagugcuuccauguuuugCg.....   | 1    | 1 | seq |
| .....uUagugcuuccauguuuuggu.....   | 2    | 1 | seq |

ccaccacuuaaacguggauguacuugcuuugaaacuaaagaaguaagugcuuccauguuuuggugaugg

|                                  |       |   |     |
|----------------------------------|-------|---|-----|
| .....uaagugcuuccauguuAuggu.....  | 1     | 1 | seq |
| .....uaGgugcuuccauguuuuggu.....  | 21    | 1 | seq |
| .....uaagugcuuccauguuuugAu.....  | 3     | 1 | seq |
| .....uGagugcuuccauguuuuggu.....  | 19    | 1 | seq |
| .....uaagugcuuccaCguuuuggu.....  | 8     | 1 | seq |
| .....uaagugcuuccGguuuuggu.....   | 10    | 1 | seq |
| .....uaagugcuuccauguuuCGgu.....  | 11    | 1 | seq |
| .....uaagugcuuccauguuuugUu.....  | 2     | 1 | seq |
| .....Caagugcuuccauguuuuggu.....  | 13    | 1 | seq |
| .....uaagugcCuccauguuuuggu.....  | 18    | 1 | seq |
| .....uaagugcuuccauguuuGgggu..... | 8     | 1 | seq |
| .....uaagugcuuccauguuuuggu.....  | 4723  | 0 | seq |
| .....uaagugcuuccauguuGuggu.....  | 1     | 1 | seq |
| .....uaagugcuuccCguuuuggu.....   | 1     | 1 | seq |
| .....uaagugcuuccauguuAuggu.....  | 1     | 1 | seq |
| .....uaagugcuuccauAuuuuggu.....  | 3     | 1 | seq |
| .....uaagugcuuccauguCuuggu.....  | 9     | 1 | seq |
| .....uaagugcuuccauguuuuggA.....  | 11    | 1 | seq |
| .....uaaAuggcuuccauguuuuggu..... | 6     | 1 | seq |
| .....Gaagugcuuccauguuuuggug....  | 24    | 1 | seq |
| .....uaagugcuuccauguuuugCug....  | 3     | 1 | seq |
| .....uaagugcuuccauguGuuuggug.... | 24    | 1 | seq |
| .....uaUgugcuuccauguuuuggug....  | 15    | 1 | seq |
| .....uaagugcuuccauguCuuggug....  | 66    | 1 | seq |
| .....uaagugcuuccauguuuugAug....  | 24    | 1 | seq |
| .....uaagugcuuccAauguuuuggug.... | 8     | 1 | seq |
| .....Aaagugcuuccauguuuuggug....  | 21    | 1 | seq |
| .....uaagugcuuccGuguuuuggug....  | 71    | 1 | seq |
| .....uUagugcuuccauguuuuggug....  | 21    | 1 | seq |
| .....uaagugcuuccauguuuugUug....  | 2     | 1 | seq |
| .....uaagugcuuccauguuCuuggug.... | 36    | 1 | seq |
| .....uaagugcuuccauCuuuuggug....  | 1     | 1 | seq |
| .....uaaguUcuuccauguuuuggug....  | 3     | 1 | seq |
| .....uaagugUuuuccauguuuuggug.... | 26    | 1 | seq |
| .....uCagugcuuccauguuuuggug....  | 4     | 1 | seq |
| .....uaagugcuuccauguuuuggCg....  | 141   | 1 | seq |
| .....uaagugcuuccUauguuuuggug.... | 31    | 1 | seq |
| .....uaagugcGuccauguuuuggug....  | 3     | 1 | seq |
| .....uaagugcuuUcauguuuuggug....  | 55    | 1 | seq |
| .....uaagugcuuAcauguuuuggug....  | 3     | 1 | seq |
| .....uaagugcuuccaGguuuuggug....  | 13    | 1 | seq |
| .....uaagugcuuccauguuuugguC....  | 12    | 1 | seq |
| .....uaagugcuCccauguuuuggug....  | 107   | 1 | seq |
| .....uaGgugcuuccauguuuuggug....  | 89    | 1 | seq |
| .....uaagugcuuccaugCuuggug....   | 52    | 1 | seq |
| .....uaagugcuuccauguuuGggug....  | 90    | 1 | seq |
| .....uaagugcuuccauguuuuggug....  | 6     | 1 | seq |
| .....uaagugcuuccaAguuuuggug....  | 6     | 1 | seq |
| .....uaagugAuuccauguuuuggug....  | 1     | 1 | seq |
| .....uaagugcuuccauguuuuggug....  | 28838 | 0 | seq |
| .....uaagugcuuccauguGuuggug....  | 4     | 1 | seq |
| .....uaagugcuuccauguuuuggug....  | 3     | 1 | seq |
| .....uaagugcuuccauguuuAguug....  | 844   | 1 | seq |
| .....uaagugcuuccauguuuCGggug.... | 45    | 1 | seq |
| .....uaagugcuuccaCguuuuggug....  | 78    | 1 | seq |
| .....uaagugcuuccauguuuugguU....  | 11    | 1 | seq |
| .....uaagugcAuuccauguuuuggug.... | 9     | 1 | seq |
| .....uaaguAcuuccauguuuuggug....  | 52    | 1 | seq |
| .....uaagugcuuccUguuuuggug....   | 7     | 1 | seq |
| .....uaagugcCuccauguuuuggug....  | 94    | 1 | seq |
| .....uaagugcuAccauguuuuggug....  | 21    | 1 | seq |
| .....uaagugcuuccauAuuuuggug....  | 15    | 1 | seq |
| .....uGagugcuuccauguuuuggug....  | 97    | 1 | seq |
| .....uaagugcuuccauguuuAggug....  | 10    | 1 | seq |
| .....uaagugcuuccauUuuuuggug....  | 2     | 1 | seq |
| .....Caagugcuuccauguuuuggug....  | 45    | 1 | seq |
| .....uaagugcuuccauguuuUgug....   | 14    | 1 | seq |
| .....uaCgugcuuccauguuuuggug....  | 3     | 1 | seq |
| .....uaagGgcuuccauguuuuggug....  | 1     | 1 | seq |



ccaccacuuaaacguggauguacuugcuuugaaacuaaagaaguaagugcuuccauguuuuggugaugg

|                                    |     |   |     |
|------------------------------------|-----|---|-----|
| .....uaagugcuuGcauguuuuggug....    | 1   | 1 | seq |
| .....uaagugcuucGauguuuuggug....    | 2   | 1 | seq |
| .....uaagCgcuccauguuuuggug....     | 77  | 1 | seq |
| .....uaagugcuuccauguuuugguA....    | 578 | 1 | seq |
| .....uaagAgcuuccauguuuuggug....    | 8   | 1 | seq |
| .....uaagugcuuccauguuuuggAg....    | 27  | 1 | seq |
| .....uaaguCcuuccauguuuuggug....    | 6   | 1 | seq |
| .....uaagugcuuccauguuGuggug....    | 1   | 1 | seq |
| .....uaagugcuGccauguuuuggug....    | 16  | 1 | seq |
| .....uaagugcuuccauguuAuggug....    | 5   | 1 | seq |
| .....uaaAugcuuccauguuuuggug....    | 17  | 1 | seq |
| .....uaagugcuuccauguuuuggGg....    | 338 | 1 | seq |
| .....uUagugcuuccauguuuugguga....   | 1   | 1 | seq |
| .....uaaguAcuuccauguuuugguga....   | 2   | 1 | seq |
| .....uaagugcuuccauguuCugguga....   | 4   | 1 | seq |
| .....uaagCgcuuccauguuuugguga....   | 1   | 1 | seq |
| .....uaagugcuuccauguuuuggCga....   | 2   | 1 | seq |
| .....uaagugcuuccGuguuuugguga....   | 1   | 1 | seq |
| .....uaagugcuuccauguuuugguga....   | 972 | 0 | seq |
| .....uaagugcuuccauguuuuggugC....   | 5   | 1 | seq |
| .....uGagugcuuccauguuuugguga....   | 2   | 1 | seq |
| .....uaagugcuucUauguuuugguga....   | 1   | 1 | seq |
| .....uaagugcuuccauguuuCgguga....   | 4   | 1 | seq |
| .....uaagugcuuccauAuuuugguga....   | 1   | 1 | seq |
| .....uaGgugcuuccauguuuugguga....   | 3   | 1 | seq |
| .....uaagugcuuccauguuuugguAa....   | 4   | 1 | seq |
| .....uaagugcCuuccauguuuugguga....  | 1   | 1 | seq |
| .....uaagugcuuccaGguuuuugguga....  | 1   | 1 | seq |
| .....uaagugcuuccauguuuuggGga....   | 2   | 1 | seq |
| .....uaagugcuuccauguuuAaguga....   | 1   | 1 | seq |
| .....uaagugcuuccauguuuuggugU....   | 10  | 1 | seq |
| .....uaagugcuuccauguuuuggAga....   | 1   | 1 | seq |
| .....uaagugcuuccaugCuuuugguga....  | 5   | 1 | seq |
| .....uaagugcuuccauguuuugAuga....   | 2   | 1 | seq |
| .....uaagugcuuccaCguuuuugguga....  | 1   | 1 | seq |
| .....uaagugcuCccauguuuugguga....   | 8   | 1 | seq |
| .....uaagugUuuccauguuuugguga....   | 2   | 1 | seq |
| .....uaagugcuuUcauguuuugguga....   | 2   | 1 | seq |
| .....uaUgugcuuccauguuuugguga....   | 1   | 1 | seq |
| .....uaagugcuuccauguuuuggugG....   | 9   | 1 | seq |
| .....uaagugcuuccauguCuuuugguga.... | 3   | 1 | seq |
| .....uaagAgcuuccauguuuugguga....   | 1   | 1 | seq |
| .....uaagugcuuccauguuAugguga....   | 2   | 1 | seq |
| .....uaaAugcuuccauguuuugguga....   | 1   | 1 | seq |
| .....uaagugcuuccauguuuuggugaG....  | 1   | 1 | seq |
| .....uaagugcuuccauguuuAugugau....  | 1   | 1 | seq |
| .....uaagugcuuccauguuuuggugaA....  | 140 | 1 | seq |
| .....uaagugcuuccauguuuuggugau....  | 4   | 0 | seq |
| .....uaagugcuuccauguuuuggugUu....  | 1   | 1 | seq |
| .....uaagugcuuccauguuuuggugaC....  | 4   | 1 | seq |
| .....aagugcuuccauguuuAag....       | 3   | 1 | seq |
| .....aagugcuuccauguuuug....        | 8   | 0 | seq |
| .....Uagugcuuccauguuuugg....       | 4   | 1 | seq |
| .....aagugcuuccauguuuUg....        | 1   | 1 | seq |
| .....aagugcuuccauguuuugg....       | 20  | 0 | seq |
| .....aagugcuuccauguuuuggG....      | 3   | 1 | seq |
| .....Cagugcuuccauguuuuggu....      | 1   | 1 | seq |
| .....aagugAuuccauguuuuggu....      | 1   | 1 | seq |
| .....aagugcuuccauguuCuggu....      | 1   | 1 | seq |
| .....aagugcuuccauguuuuggu....      | 60  | 0 | seq |
| .....aGgugcuuccauguuuuggu....      | 1   | 1 | seq |
| .....aagugcuuccauguuuuggC....      | 3   | 1 | seq |
| .....aagugcuuccauguuAuggug....     | 1   | 1 | seq |
| .....aagugcuAccauguuuuggug....     | 2   | 1 | seq |
| .....Cagugcuuccauguuuuggug....     | 1   | 1 | seq |
| .....aagugcuuccauguuuugguC....     | 1   | 1 | seq |
| .....aagugcuuccauguuuAuggug....    | 1   | 1 | seq |
| .....Uagugcuuccauguuuuggug....     | 6   | 1 | seq |
| .....aagugcuuccauguuuuggCg....     | 8   | 1 | seq |

ccaccacuuaaacguggauguacucugcuuugaaacuaaagaaguaagugcuuccauguuuuggugaugg

|                                 |      |   |     |
|---------------------------------|------|---|-----|
| .....aagugcuCccauguuuuggug....  | 4    | 1 | seq |
| .....aagugcuuccauguuuugCug....  | 1    | 1 | seq |
| .....aagugcuuUcauguuuuggug....  | 2    | 1 | seq |
| .....aagugcuuccauguuuGggug....  | 6    | 1 | seq |
| .....aagugcuuccauguuuuggug....  | 1259 | 0 | seq |
| .....aagugcuuccauguuuuggGg....  | 17   | 1 | seq |
| .....aagugcuuGcauguuuuggug....  | 1    | 1 | seq |
| .....Gagugcuuccauguuuuggug....  | 6    | 1 | seq |
| .....aagugcuuAcauguuuuggug....  | 2    | 1 | seq |
| .....aagCgcuuccauguuuuggug....  | 2    | 1 | seq |
| .....aagugcuuccaCguuuuuggug.... | 3    | 1 | seq |
| .....aagugcuuccauguuuuAgug....  | 17   | 1 | seq |
| .....aagugcuuccauguuGuggug....  | 1    | 1 | seq |
| .....aagugAuccauguuuuggug....   | 1    | 1 | seq |
| .....aagugUuccauguuuuggug....   | 1    | 1 | seq |
| .....aUgugcuuccauguuuuggug....  | 1    | 1 | seq |
| .....aagugcuuccauguuuugguA....  | 6    | 1 | seq |
| .....aagugcuuccauguuCuggug....  | 4    | 1 | seq |
| .....aagugcuuccauguuGuuggug.... | 1    | 1 | seq |
| .....aagugcuuccauguuuugAug....  | 1    | 1 | seq |
| .....aGgugcuuccauguuuuggug....  | 6    | 1 | seq |
| .....aagugcuuccaugCuuggug....   | 1    | 1 | seq |
| .....aagugcuuccauguCuuggug....  | 4    | 1 | seq |
| .....aagugcCuuccauguuuuggug.... | 2    | 1 | seq |
| .....aaAugcuuccauguuuuggug....  | 1    | 1 | seq |
| .....aagugcuuccGuguuuuggug....  | 3    | 1 | seq |
| .....aagugcuuccauguuuCggug....  | 9    | 1 | seq |
| .....aagugcuuccauUuuuuggug....  | 1    | 1 | seq |
| .....aagugcuuccauguuuuggugU...  | 1    | 1 | seq |
| .....aagugcuuccauguuuuggugG...  | 3    | 1 | seq |
| .....aagugcuuccauguuuugguga...  | 59   | 0 | seq |
| .....aagugcuCccauguuuugguga...  | 1    | 1 | seq |
| .....Gagugcuuccauguuuugguga...  | 1    | 1 | seq |
| .....aagugcuuccauguuuuggugaA... | 10   | 1 | seq |
| .....agugcuuccauguuuuggu.....   | 1    | 0 | seq |
| .....agugcuuccauguuuuggug....   | 12   | 0 | seq |
| .....agugcuuccauguuuuAgug....   | 0    | 1 | seq |
| .....aguAcuuccauguuuuggug....   | 1    | 1 | seq |
| .....agugcuuccauguuuGggug....   | 1    | 1 | seq |
| .....agugcuuccauguuuuggCg....   | 1    | 1 | seq |
| .....agugcuuccauguuuuAguga...   | 1    | 1 | seq |
| .....gugcuuccauguuuuggu.....    | 1    | 0 | seq |
| .....gugcuuccauguuuuggGg....    | 1    | 1 | seq |
| .....gugcuuccauguuuugguga...    | 1    | 0 | seq |
| .....ugcuuccauguuuuggug....     | 4    | 0 | seq |
| .....ugcuuccauguuuugguAa...     | 1    | 1 | seq |
| .....gcuuccauguuuugguga...      | 1    | 0 | seq |
